# Supplementary material
Source: bioRxiv or medRxiv preprint supplement (https://www.biorxiv.org/highwire/filestream/1852/field_highwire_adjunct_files/1/005363-2.pdf)
Supplement: Supplementary file [file 005363-2.pdf]

# Brandvain and Coop.

## Sperm dependent female meiotic drive.

In[1]=

### Model I. Tadtional female drive

---

#### Set up

```
In[2]= (*Allele and Genotype frequencies*)
ClearAll["Global`*"]
fA = 1 - fB;
fAA = fA^2 + fA fB x;
fAB = 2 fA fB (1 - x);
fBB = fB^2 + fA fB x;
```

#### Drive

```
In[7]= fAAdrive = FullSimplify[fA (fAA + fAB (1 - d))];
fABdrive = FullSimplify[fA (fBB + fAB d) + fB (fAA + fAB (1 - d))];
fBBdrive = FullSimplify[fB (fAB d + fBB)];
```

#### Selection

```
In[10]= wAA = 1; wAB = 1 - hs; wBB = 1 - s; (*genotypic fitnesses*)
W̄ = FullSimplify[fAAdrive wAA + fABdrive wAB + fBBdrive wBB]; (*mean fitness*)
fAAsel = FullSimplify[(fAAdrive * wAA) / W̄];
fABsel = FullSimplify[(fABdrive * wAB) / W̄];
fBBsel = FullSimplify[(fBBdrive wBB) / W̄];
fAsel = FullSimplify[fAAsel + fABsel / 2];
fBsel = FullSimplify[fBBsel + fABsel / 2];
ΔfA = FullSimplify[fAsel - fA];
ΔfB = FullSimplify[fBsel - fB];
```

---

#### Analysis

For all analyses we assume HWE (i.e.  $x = 0$ ), we relax this assumption in numerical iterations

## Invasion

In[19]:= **scaledDeltaDriveWhenRare** = (FullSimplify[ $\Delta f_B / (f_B * (1 - f_B)) / . x \rightarrow 0$ ] /. **fB**  $\rightarrow 0$ )

Out[19]= 
$$\frac{1}{2} (-1 - 2 d (-1 + h s) - h s)$$

Noting that the change in frequency of a standard driver is independent of s when rare, we solve for the value of hs required for invasion.

In[20]:= **invasionCrit** = Solve[scaledDeltaDriveWhenRare == 0, **hs**]

Out[20]= 
$$\left\{ \left\{ h s \rightarrow \frac{-1 + 2 d}{1 + 2 d} \right\} \right\}$$

## Fixation

In[21]:= **scaledDeltaDriveWhenCommon** = (FullSimplify[ $\Delta f_B / (f_B * (1 - f_B)) / . x \rightarrow 0$ ] /. **fB**  $\rightarrow 1$ )

Out[21]= 
$$\frac{1 + h s + 2 (d (-1 + h s) - 2 h s + s)}{2 (-1 + s)}$$

We solve for fixation conditions when recessive or not.

In[22]:= **fixationCritRecessive** = Solve[scaledDeltaDriveWhenCommon == 0, **s**] /. **hs**  $\rightarrow 0$   
**fixationCritNotRecessive** = Solve[scaledDeltaDriveWhenCommon == 0, **s**]

Out[22]= 
$$\left\{ \left\{ s \rightarrow \frac{1}{2} (-1 + 2 d) \right\} \right\}$$

Out[23]= 
$$\left\{ \left\{ s \rightarrow \frac{1}{2} (-1 + 2 d + 3 h s - 2 d h s) \right\} \right\}$$

## Equilibrium

We identify the equilibrium frequency of the standard driver

In[24]:= **eqfB** = Solve[(FullSimplify[ $\Delta f_B / . x \rightarrow 0$ ]) == 0, **fB**][[4]]

Out[24]= 
$$\left\{ f_B \rightarrow \frac{\left( 8 d h s - 4 d s + \sqrt{(-4 (1 - 2 d + h s + 2 d h s) (-4 h s + 8 d h s + 2 s - 4 d s) + (-8 d h s + 4 d s)^2)} \right)}{2 (-4 h s + 8 d h s + 2 s - 4 d s)} \right\}$$

We plot this equilibrium frequency assuming a recessive fitness cost.

```
In[25]:= ContourPlot[If[fB > 1, 1 / 0, If[fB < 0, 1 / 0, fB]] /. eqfB /. hs -> 0, {d, .5, 1},
  {s, 0, 1}, PlotLegends -> BarLegend[Automatic, LegendLabel -> "fB*"], PlotLabel ->
  "Equilibrium frequency of a standard driver with a recessive fitness cost",
  FrameLabel -> {"d (drive of the B allele)",
  "s (selection against driver, assuming recessive fitness cost)"}]
```

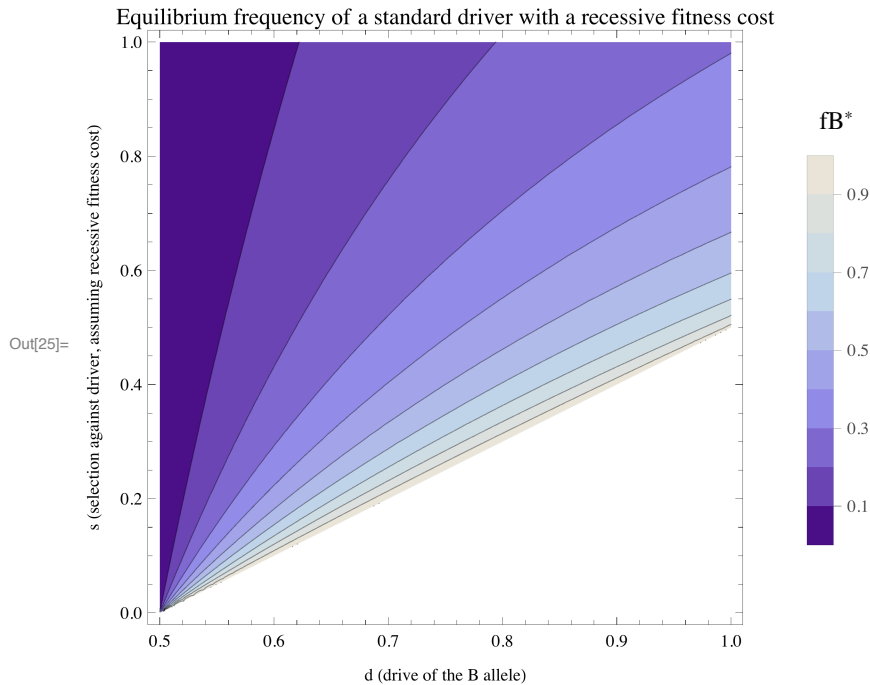

```
In[26]:= FullSimplify[fAADrive + fABDrive + fBBDrive]
```

Out[26]= 1

## Model 2. Female drive depends on sperm haplotype (single pleiotropic locus)

The B allele is transmitted with probability,  $d$ , in heterozygous females when fertilized by B-bearing sperm.

$x$  represents the deviation from Hardy - Weinberg Equilibrium

### Setup

```
In[27]:= (*Allele and Genotype frequencies*)
ClearAll["Global`*"]
fA = 1 - fB;
fAA = fA^2 + fA fB x;
fAB = 2 fA fB (1 - x);
fBB = fB^2 + fA fB x;
```

## Drive

```
In[32]:= (*Genotype frequencies after drive*)
fAADrive = FullSimplify[fA (fAA + fAB / 2)];
fABDrive = FullSimplify[fB (fAA + fAB * (1 - d)) + fA (fAB / 2 + fBB)];
fBBDrive = FullSimplify[fB (fAB d + fBB)];
```

## Selection

```
In[35]:= wAA = 1; wAB = 1 - hs; wBB = 1 - s; (*genotypic fitnesses*)
W̄ = FullSimplify[fAADrive wAA + fABDrive wAB + fBBDrive wBB]; (*mean fitness*)
fAAsel = FullSimplify[(fAADrive * wAA) / W̄];
fABsel = FullSimplify[(fABDrive * wAB) / W̄];
fBBsel = FullSimplify[(fBBDrive wBB) / W̄];
fAsel = FullSimplify[fAAsel + fABsel / 2];
fBsel = FullSimplify[fBBsel + fABsel / 2];
ΔfA = FullSimplify[fAsel - fA];
ΔfB = FullSimplify[fBsel - fB];
```

## Analysis

Note, we assume no deviation from Hardy-Weinberg [i.e.  $x=0$ ] for all analytical results, and therefore these answers are approximations. In the supplementary material we show that results of exact recursions are remarkably consistent from these approximate analytical solutions.

### Assuming the cost of drive is fully recessive [i.e. $hs$ is zero]

#### Invasion

```
In[44]:= ΔfBinvasive = (FullSimplify[ΔfB /. hs → 0 /. x → 0] / fB^2 /. fB → 0)
```

```
Out[44]=  $\frac{1}{2} (-1 + d (2 - 4 s))$ 
```

```
In[45]:= spermDepRecessiveInvasive = Solve[ΔfBinvasive == 0, s]
```

```
Out[45]=  $\left\{ \left\{ s \rightarrow \frac{-1 + 2 d}{4 d} \right\} \right\}$ 
```

```
In[46]:= plotInvasion4spermDepRecessive =
  Plot[s /. spermDepRecessiveInvasive [[1]], {d, .5, 1}, PlotStyle → {Black, Thick}];
```

```
In[47]:= plotRelChange4RarespermDepRecessive = ContourPlot[{ΔfBinvasive}, {d, 0.5, 1},
  {s, 0, 1}, PlotLegends → BarLegend[Automatic, LegendLabel → "scaled ΔB"],
  FrameLabel → {"d (drive)", "s (selection)"},
  PlotLabel → "Invasion of recessive sperm dependent driver"];
```

```
In[48]:= Show[plotRelChange4RarespermDepRecessive, plotInvasion4spermDepRecessive]
```

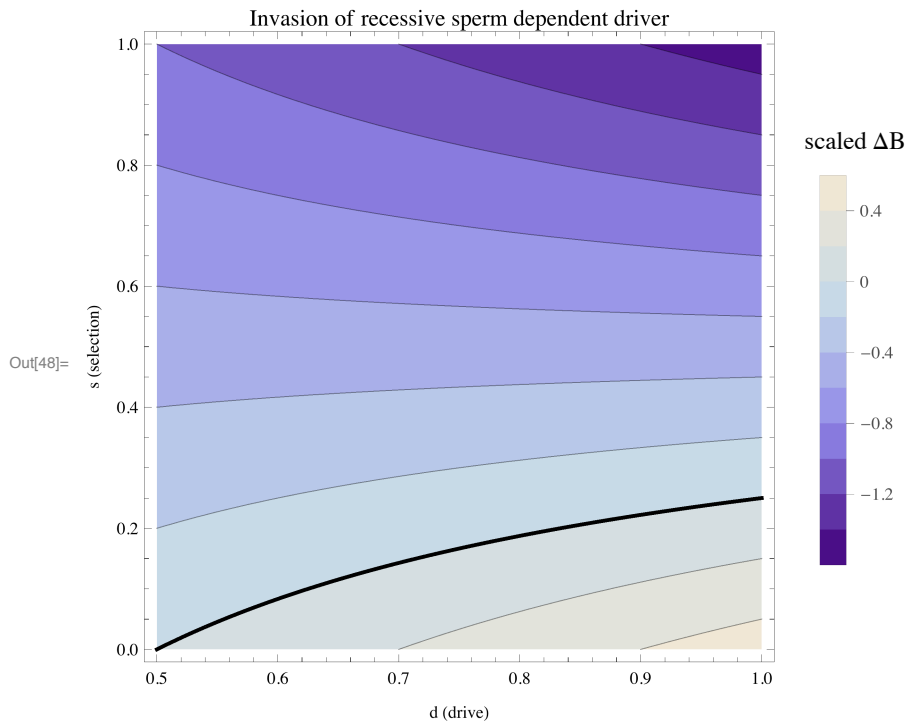

## Fixation

```
In[49]:= ΔfBfix = FullSimplify[FullSimplify[ΔfB /. hs → 0 /. x → 0] / fA] /. fB → 1
```

$$\text{Out[49]= } \frac{-1 + 2d - 2s}{2 - 2s}$$

```
In[50]:= spermDepRecessiveFix = Solve[ΔfBfix == 0, s]
```

$$\text{Out[50]= } \left\{ \left\{ s \rightarrow \frac{1}{2} (-1 + 2d) \right\} \right\}$$

```
In[51]:= (s /. spermDepRecessiveFix [[1]])
```

$$\text{Out[51]= } \frac{1}{2} (-1 + 2d)$$

```
In[52]:= plotFixation4spermDepRecessive =  
Plot[s /. spermDepRecessiveFix [[1]], {d, .5, 1}, PlotStyle → {Red, Thick}];
```

```
In[53]:= (*Note we artificially rescaled z to be -.1 for all negative values*)  
plotRelChange4CommonSpermDepRecessive =  
ContourPlot[If[s > (s /. spermDepRecessiveFix [[1])], -.1, ΔfBfix], {d, 0.5, 1},  
{s, 0, 1}, PlotLegends → BarLegend[Automatic, LegendLabel → "scaled ΔB"],  
FrameLabel → {"d (drive)", "s (selection)"},  
PlotLabel → "Fixation of recessive sperm dependent driver"];
```

```
In[54]:= Show[plotRelChange4CommonSpermDepRecessive, plotFixation4spermDepRecessive]
```

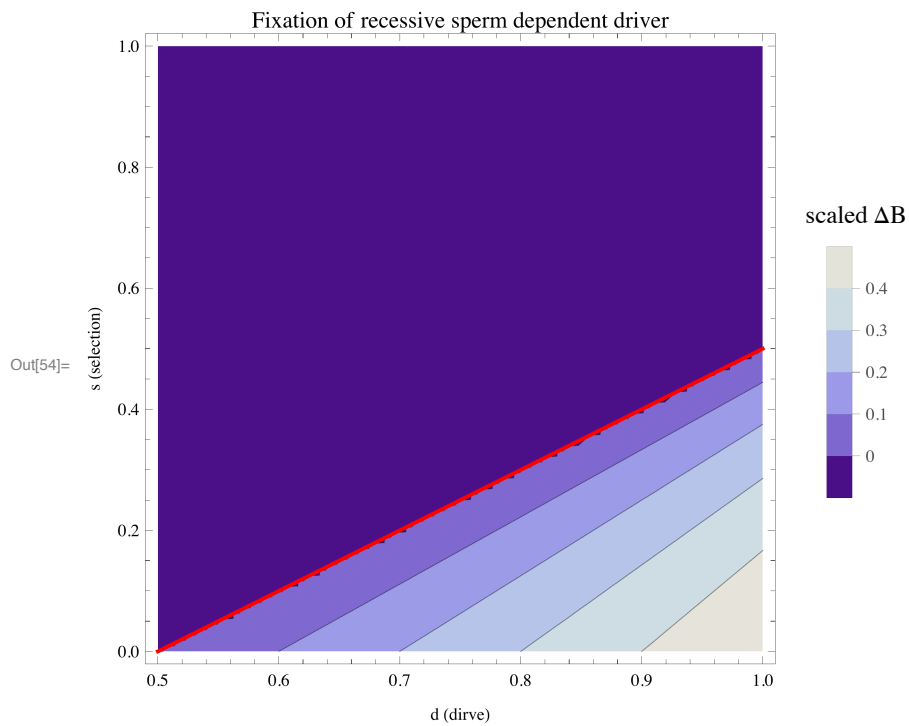

## Bistability Point

```
In[55]:= FBbistabSpermDepRecessive = Solve[FullSimplify[ΔfB /. hs → 0 /. x → 0] == 0, fB][[4]]
```

Out[55]=  $\left\{ fB \rightarrow \frac{1 - 2d + 4ds}{-2s + 4ds} \right\}$

```
In[56]:= bistab = ContourPlot[(If[fB < 0, 0, If[fB > 1, 1, fB]]) /. FBbistabSpermDepRecessive,
  {d, .5, 1}, {s, 0, 1}, PlotLegends → BarLegend[Automatic, LegendLabel → "fB*"],
  FrameLabel → {"d (dirve)", "s (selection)"}, PlotLabel →
  "Threshold frequency for fixation of recessive self-promoting driver"];
```

In[57]:= **Show[bistab, plotFixation4spermDepRecessive, plotInvasion4spermDepRecessive]**

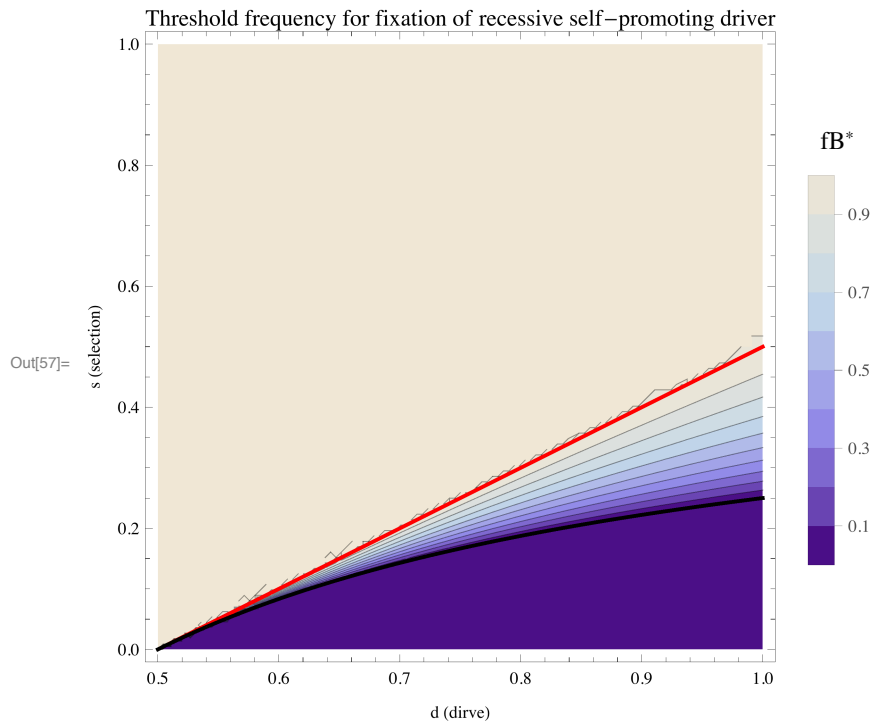

**Assuming the cost of drive is not fully recessive [i.e.  $h_s$  is nonzero]**

### Invasion

Note with any heterozgous cost (i.e.  $h_s > 0$ ) a self - promoting driver cannot invade

In[58]:= **FullSimplify[FullSimplify[ $\Delta f_B /. x \rightarrow 0$ ] /  $f_B$ ] /.  $f_B \rightarrow 0$**

Out[58]=  $-h_s$

### Fixation

In[59]:=  **$\Delta f_{Bfix} = \text{FullSimplify}[\text{FullSimplify}[\text{FullSimplify}[\Delta f_B /. x \rightarrow 0] / f_A] /. f_B \rightarrow 1]$**

Out[59]= 
$$\frac{1 + 2 d (-1 + h_s) - 3 h_s + 2 s}{2 (-1 + s)}$$

In[60]:= **spermDepNotRecessiveFix = Solve[ $\Delta f_{Bfix} == 0, s$ ]**

Out[60]= 
$$\left\{ \left\{ s \rightarrow \frac{1}{2} (-1 + 2 d + 3 h_s - 2 d h_s) \right\} \right\}$$

In[61]:= **spermDepAddFix = Solve[ $\Delta f_{Bfix} == 0 /. h_s \rightarrow s / 2, s$ ]**

Out[61]= 
$$\left\{ \left\{ s \rightarrow \frac{2 (-1 + 2 d)}{1 + 2 d} \right\} \right\}$$

```
In[62]:= plotspermDepAddFix =
Plot[s /. spermDepAddRecessiveFix , {d, .5, 1}, PlotStyle -> {Red, Thick}];
ReplaceAll::reps : {spermDepAddRecessiveFix} is neither a list of
replacement rules nor a valid dispatch table, and so cannot be used for replacing. >>
```

## Bistability Point

```
In[63]:= FBbistabSpermDepNotRecessive = Solve[FullSimplify[ΔfB /. x -> 0] == 0, fB][[3]]
```

$$\text{Out[63]= } \left\{ fB \rightarrow \left( -1 + 2 d + 3 h s + 2 d h s - 4 d s - \sqrt{(-8 h s (-2 h s + 4 d h s + 2 s - 4 d s) + (1 - 2 d - 3 h s - 2 d h s + 4 d s)^2)} \right) / (2 (-2 h s + 4 d h s + 2 s - 4 d s)) \right\}$$

An Example of a non - recessive driver [Assuming additivity]

```
In[64]:= bistab = ContourPlot[
(If[fB < 0, 0, If[fB > 1, 1, fB]]) /. FBbistabSpermDepNotRecessive /. hs -> (s / 2),
{d, .5, 1}, {s, 0, 1}, PlotLegends -> BarLegend[Automatic, LegendLabel -> "fB*"],
FrameLabel -> {"d (dirve)", "s (selection)"}, PlotLabel ->
"Threshold frequency for fixation of recessive self-promoting driver"];
```

```
In[65]:= Show[bistab, plotspermDepAddFix]
```

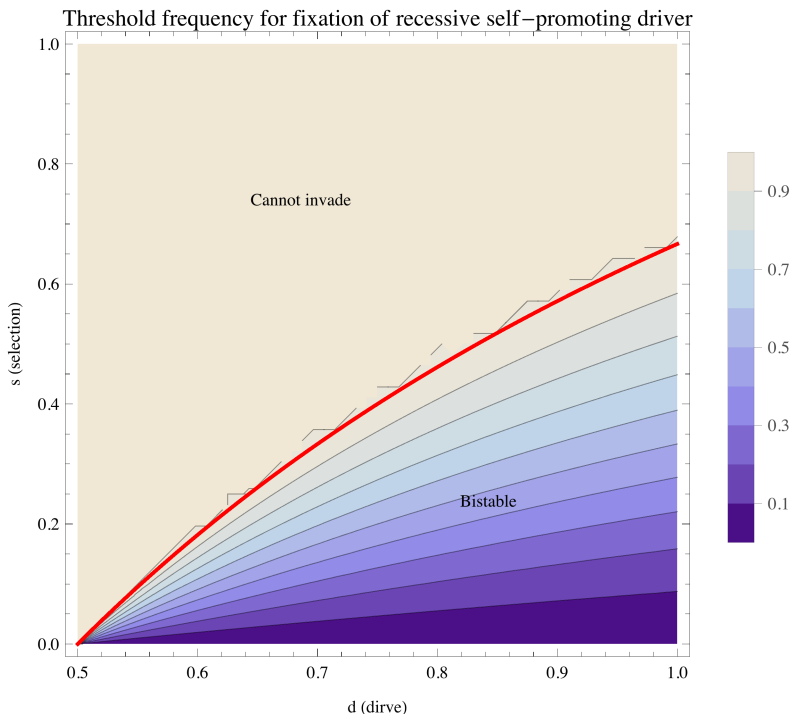



In[67]:=

## Model 3. Female drive depends on male genotype (single pleiotropic locus)

The B allele is transmitted with probability,  $d$  and  $d_h$ , in heterozygous females when fertilized BB and AB males, respectively.

$x$  represents the deviation from Hardy - Weinberg Equilibrium

### Setup

```
In[68]:= (*Allele and Genotype frequencies*)
ClearAll["Global`*"]
fA = 1 - fB;
fAA = fA^2 + fA fB x;
fAB = 2 fA fB (1 - x);
fBB = fB^2 + fA fB x;
```

### Drive

```
In[73]:= (*Genotype frequencies after drive*)
fAA_drive = FullSimplify[fAA (fAA + fAB / 2) + fAB (fAA / 2 + fAB (1 - d_het) / 2)];
fAB_drive = FullSimplify[
  fAA (fAB / 2 + fBB) + fAB (fAA / 2 + fAB / 2 + fBB (1 - d_hom)) + fBB (fAA + fAB / 2)];
fBB_drive = FullSimplify[fAB (fAB d_het / 2 + fBB d_hom) + fBB (fAB / 2 + fBB)];
```

### Selection

```
In[76]:= wAA = 1; wAB = 1 - hs; wBB = 1 - s; (*genotypic fitnesses*)
W_bar = FullSimplify[fAA_drive wAA + fAB_drive wAB + fBB_drive wBB]; (*mean fitness*)
fAA_sel = FullSimplify[(fAA_drive * wAA) / W_bar];
fAB_sel = FullSimplify[(fAB_drive * wAB) / W_bar];
fBB_sel = FullSimplify[(fBB_drive wBB) / W_bar];
fA_sel = FullSimplify[fAA_sel + fAB_sel / 2];
fB_sel = FullSimplify[fBB_sel + fAB_sel / 2];
ΔfA = FullSimplify[fA_sel - fA];
ΔfB = FullSimplify[fB_sel - fB];
```

```
In[85]:= FullSimplify[fAADrive + fABDrive + fBBDrive]
```

```
Out[85]= 1
```

## Analysis

### Analytical example - recessive fitness cost

#### Invasion

```
In[86]:= invasion4maleDepRecessive =  
Solve[ ((FullSimplify[(ΔfB /. x → 0 /. hs → 0)] / fB^2) /. fB → 0) == 0, s]
```

```
Out[86]= {{s →  $\frac{-1 + 2 d_{het}}{2 d_{het}}$ }}
```

```
In[87]:= plotInvasion4maleDepRecessive =  
Plot[s /. invasion4maleDepRecessive /. dhet -> dhom,  
{dhom, .5, 1}, PlotStyle -> {Black, Thick}];
```

#### Fixation

```
In[88]:= fixation4maleDepRecessive =  
Solve[(FullSimplify[(FullSimplify[(ΔfB /. x → 0 /. hs → 0) / fA] /. fB → 1])] == 0, s]
```

```
Out[88]= {{s →  $\frac{1}{2} (-1 + 2 d_{hom})$ }}
```

```
In[89]:= plotFixation4maleDepRecessive = Plot[s /. fixation4maleDepRecessive /. dhet -> dhom,  
{dhom, .5, 1}, PlotStyle -> {Red, Thick}];
```

```
In[90]:= Show[Plot[0, {dhom, 0.5, 1}, AxesLabel -> {"d (drive) assuming dhet=dhom=d",  
"s (selection against drive homozygotes)"}, PlotRange -> {{.5, 1}, {0, .5}},  
PlotLabel -> "Invasion and fixation conditions for a male dependent driver"],  
plotFixation4maleDepRecessive, plotInvasion4maleDepRecessive]
```

Invasion and fixation conditions for a male dependent driver  
s (selection against drive homozygotes)

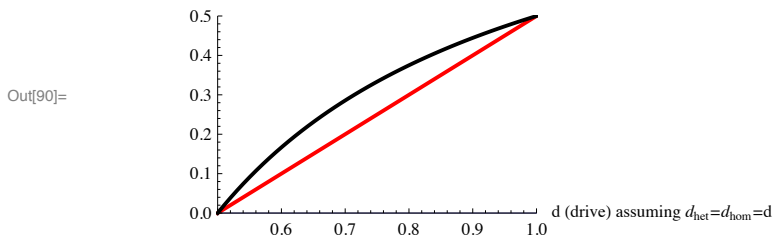

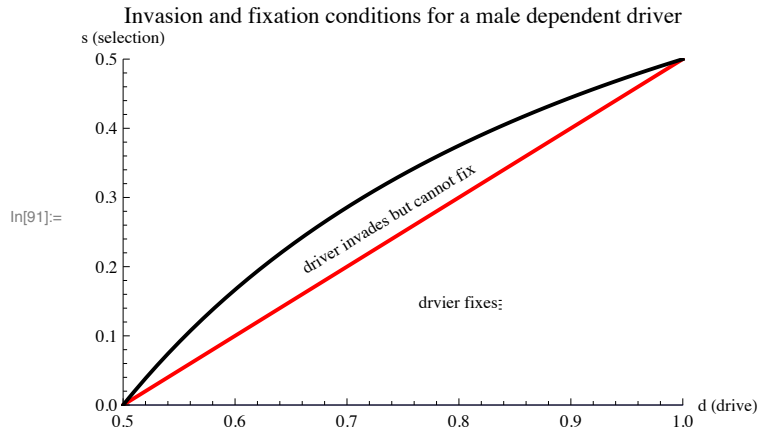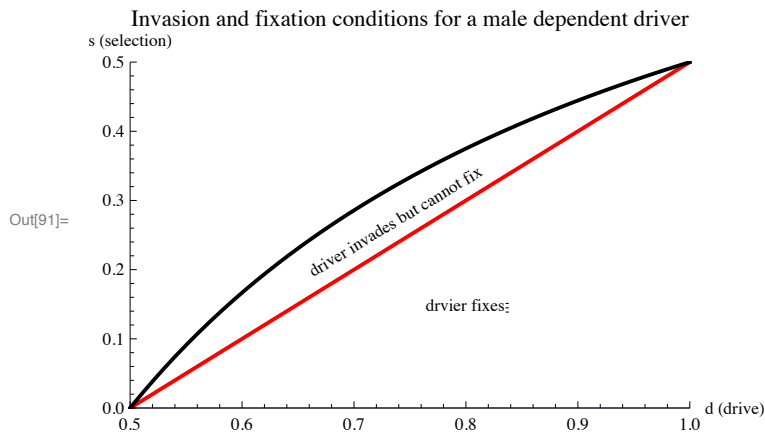

## Equilibrium

In[92]= **FBeqMaleepRecessive =**  
**Solve[FullSimplify[ $\Delta fB /. x \rightarrow 0 /. hs \rightarrow 0 /. d_{het} \rightarrow d_{hom}] == 0, fB][[4]]$**

Out[92]=  $\left\{ fB \rightarrow \frac{2 (1 - 2 d_{hom} + 2 s d_{hom})}{(-1 + 2 s) (-1 + 2 d_{hom})} \right\}$

In[93]=

In[94]= **eqfig = ContourPlot[ (If[fB < 0, 0, If[fB > 1, 1, fB]) /. FBeqMaleepRecessive,**  
**{d<sub>hom</sub>, 0.5, 1}, {s, 0, .5}, PlotLegends → BarLegend[Automatic, LegendLabel → "fB\*"],**  
**FrameLabel → {"d (drive) assuming d<sub>het</sub>=d<sub>hom</sub>=d",**  
**"s (selection, assuming recessive fitness cost)"}];**

```
In[95]:= Show[eqfig, plotInvasion4maleDepRecessive, plotFixation4maleDepRecessive]
```

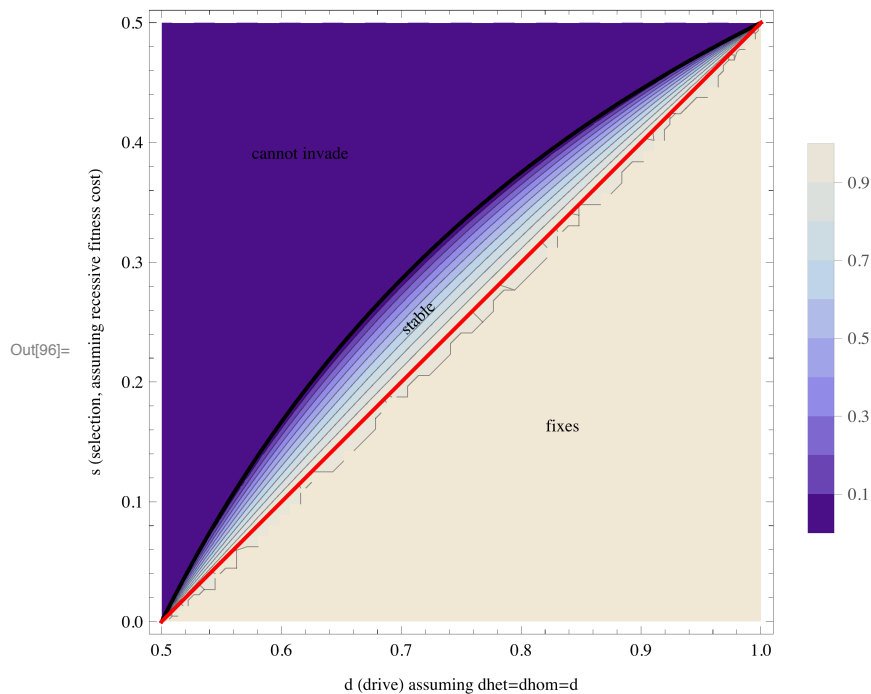

```
In[97]:=
```

## Model 4. Female drive depends on sperm haplotype (two tightly linked, loci in coupling phase)

We have one locus with two alleles, A (non-driving) and B (traditional driver), as well as a tightly linked locus where one allele modifies drive. Assuming no recombination this functions as a third allele, C. This tightly-linked locus is on the B background.

When C increases drive in heterozygous females it fertilizes, it is a drive enhancer (the B+ allele in our ms).

When C decreases drive in heterozygous females it fertilizes, it is a drive suppressor (the B- allele in our ms).

## Setup

```
In[98]:= ClearAll["Global`*"]
fA = .
fAA = .
fAB = .
fAC = .
fBB = .
fBC = .
fCC = .
minormod = {d1 -> d0 + ε}
(*assuming the sperm acting modifier additively increases drive by epsilon*)
SUMTOONE = {fA -> 1 - (fB + fC)};
HWE =
{fAA -> fA^2, fAB -> 2 fA fB, fAC -> 2 fA fC, fBB -> fB^2, fBC -> 2 fB fC, fCC -> fC^2};
GENOFREQS = {fA -> fAA + fAB / 2 + fAC / 2,
fB -> fBB + fAB / 2 + fBC / 2, fC -> fCC + fBC / 2 + fFC / 2};
```

```
In[110]:=
```

## Drive

```
In[111]:= (*Here we caculate all genotypes after drive. For book-
keeping purposes we distinguish between reciprocal homozygotes,
but remove this distinction belowsun them below*)
```

```
In[112]:= AAn =
FullSimplify[fAA * fAA * 1 + fAA * fAB * 1 / 2 + fAA * fAC * 1 / 2 + fAA * fBB * 0 + fAA * fBC * 0 +
fAA * fCC * 0 + fAB * fAA * (1 - d0) + fAB * fAB * (1 - d0) / 2 + fAB * fAC * (1 - d0) / 2 +
fAB * fBB * 0 + fAB * fBC * 0 + fAB * fCC * 0 + fAC * fAA * (1 - d0) + fAC * fAB * (1 - d0) / 2 +
fAC * fAC * (1 - d0) / 2 + fAC * fBB * 0 + fAC * fBC * 0 + fAC * fCC * 0 + fBB * fAA * 0 +
fBB * fAB * 0 + fBB * fAC * 0 + fBB * fBB * 0 + fBB * fBC * 0 + fBB * fCC * 0 + fBC * fAA * 0 +
fBC * fAB * 0 + fBC * fAC * 0 + fBC * fBB * 0 + fBC * fBC * 0 + fBC * fCC * 0 + fCC * fAA * 0 +
fCC * fAB * 0 + fCC * fAC * 0 + fCC * fBB * 0 + fCC * fBC * 0 + fCC * fCC * 0 + 0];
ABn = FullSimplify[fAA * fAA * 0 + fAA * fAB * 1 / 2 + fAA * fAC * 0 + fAA * fBB * 1 +
fAA * fBC * 1 / 2 + fAA * fCC * 0 + fAB * fAA * 0 + fAB * fAB * (1 - d0) / 2 +
fAB * fAC * 0 + fAB * fBB * (1 - d0) + fAB * fBC * (1 - d0) / 2 + fAB * fCC * 0 +
fAC * fAA * 0 + fAC * fAB * (1 - d0) / 2 + fAC * fAC * 0 + fAC * fBB * (1 - d0) +
fAC * fBC * (1 - d0) / 2 + fAC * fCC * 0 + fBB * fAA * 0 + fBB * fAB * 0 + fBB * fAC * 0 +
fBB * fBB * 0 + fBB * fBC * 0 + fBB * fCC * 0 + fBC * fAA * 0 + fBC * fAB * 0 +
fBC * fAC * 0 + fBC * fBB * 0 + fBC * fBC * 0 + fBC * fCC * 0 + fCC * fAA * 0 +
fCC * fAB * 0 + fCC * fAC * 0 + fCC * fBB * 0 + fCC * fBC * 0 + fCC * fCC * 0 + 0];
ACn = FullSimplify[fAA * fAA * 0 + fAA * fAB * 0 + fAA * fAC * 1 / 2 + fAA * fBB * 0 +
fAA * fBC * 1 / 2 + fAA * fCC * 1 + fAB * fAA * 0 + fAB * fAB * 0 + fAB * fAC * (1 - d1) / 2 +
fAB * fBB * 0 + fAB * fBC * (1 - d1) / 2 + fAB * fCC * (1 - d1) + fAC * fAA * 0 + fAC * fAB * 0 +
fAC * fAC * (1 - d1) / 2 + fAC * fBB * 0 + fAC * fBC * (1 - d1) / 2 + fAC * fCC * (1 - d1) +
fBB * fAA * 0 + fBB * fAB * 0 + fBB * fAC * 0 + fBB * fBB * 0 + fBB * fBC * 0 + fBB * fCC * 0 +
fBC * fAA * 0 + fBC * fAB * 0 + fBC * fAC * 0 + fBC * fBB * 0 + fBC * fBC * 0 + fBC * fCC * 0 +
fCC * fAA * 0 + fCC * fAB * 0 + fCC * fAC * 0 + fCC * fBB * 0 + fCC * fBC * 0 + fCC * fCC * 0 + 0];
BAAn = FullSimplify[fAA * fAA * 0 + fAA * fAB * 0 + fAA * fAC * 0 + fAA * fBB * 0 + fAA * fBC * 0 +
fAA * fCC * 0 + fAB * fAA * d0 + fAB * fAB * d0 / 2 + fAB * fAC * d0 / 2 + fAB * fBB * 0 +
fAB * fBC * 0 + fAB * fCC * 0 + fAC * fAA * 0 + fAC * fAB * 0 + fAC * fAC * 0 + fAC * fBB * 0 +
fAC * fBC * 0 + fAC * fCC * 0 + fBB * fAA * 1 + fBB * fAB * 1 / 2 + fBB * fAC * 1 / 2 +
fBB * fBB * 0 + fBB * fBC * 0 + fBB * fCC * 0 + fBC * fAA * 1 / 2 + fBC * fAB * 1 / 4 +
```

```

    fBC * fAC * 1 / 4 + fBC * fBB * 0 + fBC * fBC * 0 + fBC * fCC * 0 + fCC * fAA * 0 +
    fCC * fAB * 0 + fCC * fAC * 0 + fCC * fBB * 0 + fCC * fBC * 0 + fCC * fCC * 0 + 0];
BBn = FullSimplify[fAA * fAA * 0 + fAA * fAB * 0 + fAA * fAC * 0 + fAA * fBB * 0 + fAA * fBC * 0 +
fAA * fCC * 0 + fAB * fAA * 0 + fAB * fAB * d0 / 2 + fAB * fAC * 0 + fAB * fBB * d0 +
fAB * fBC * d0 / 2 + fAB * fCC * 0 + fAC * fAA * 0 + fAC * fAB * 0 + fAC * fAC * 0 +
fAC * fBB * 0 + fAC * fBC * 0 + fAC * fCC * 0 + fBB * fAA * 0 + fBB * fAB * 1 / 2 + fBB * fAC * 0 +
fBB * fBB * 1 + fBB * fBC * 1 / 2 + fBB * fCC * 0 + fBC * fAA * 0 + fBC * fAB * 1 / 4 +
fBC * fAC * 0 + fBC * fBB * 1 / 2 + fBC * fBC * 1 / 4 + fBC * fCC * 0 + fCC * fAA * 0 +
fCC * fAB * 0 + fCC * fAC * 0 + fCC * fBB * 0 + fCC * fBC * 0 + fCC * fCC * 0 + 0];
BCn = FullSimplify[fAA * fAA * 0 + fAA * fAB * 0 + fAA * fAC * 0 + fAA * fBB * 0 +
fAA * fBC * 0 + fAA * fCC * 0 + fAB * fAA * 0 + fAB * fAB * 0 + fAB * fAC * (d1) / 2 +
fAB * fBB * 0 + fAB * fBC * (d1) / 2 + fAB * fCC * d1 + fAC * fAA * 0 + fAC * fAB * 0 +
fAC * fAC * 0 + fAC * fBB * 0 + fAC * fBC * 0 + fAC * fCC * 0 + fBB * fAA * 0 + fBB * fAB * 0 +
fBB * fAC * 1 / 2 + fBB * fBB * 0 + fBB * fBC * 1 / 2 + fBB * fCC * 1 + fBC * fAA * 0 +
fBC * fAB * 0 + fBC * fAC * 1 / 4 + fBC * fBB * 0 + fBC * fBC * 1 / 4 + fBC * fCC * 1 / 2 +
fCC * fAA * 0 + fCC * fAB * 0 + fCC * fAC * 0 + fCC * fBB * 0 + fCC * fBC * 0 + fCC * fCC * 0 + 0];
CAN = FullSimplify[fAA * fAA * 0 + fAA * fAB * 0 + fAA * fAC * 0 + fAA * fBB * 0 +
fAA * fBC * 0 + fAA * fCC * 0 + fAB * fAA * 0 + fAB * fAB * 0 + fAB * fAC * 0 + fAB * fBB * 0 +
fAB * fBC * 0 + fAB * fCC * 0 + fAC * fAA * d0 + fAC * fAB * d0 / 2 + fAC * fAC * d0 / 2 +
fAC * fBB * 0 + fAC * fBC * 0 + fAC * fCC * 0 + fBB * fAA * 0 + fBB * fAB * 0 + fBB * fAC * 0 +
fBB * fBB * 0 + fBB * fBC * 0 + fBB * fCC * 0 + fBC * fAA * 1 / 2 + fBC * fAB * 1 / 4 +
fBC * fAC * 1 / 4 + fBC * fBB * 0 + fBC * fBC * 0 + fBC * fCC * 0 + fCC * fAA * 1 +
fCC * fAB * 1 / 2 + fCC * fAC * 1 / 2 + fCC * fBB * 0 + fCC * fBC * 0 + fCC * fCC * 0 + 0];
CBn = FullSimplify[fAA * fAA * 0 + fAA * fAB * 0 + fAA * fAC * 0 + fAA * fBB * 0 + fAA * fBC * 0 +
fAA * fCC * 0 + fAB * fAA * 0 + fAB * fAB * 0 + fAB * fAC * 0 + fAB * fBB * 0 + fAB * fBC * 0 +
fAB * fCC * 0 + fAC * fAA * 0 + fAC * fAB * d0 / 2 + fAC * fAC * 0 + fAC * fBB * d0 +
fAC * fBC * d0 / 2 + fAC * fCC * 0 + fBB * fAA * 0 + fBB * fAB * 0 + fBB * fAC * 0 +
fBB * fBB * 0 + fBB * fBC * 0 + fBB * fCC * 0 + fBC * fAA * 0 + fBC * fAB * 0 + fBC * fAC * 0 +
fBC * fBB * 1 / 2 + fBC * fBC * 1 / 4 + fBC * fCC * 0 + fCC * fAA * 0 +
fCC * fAB * 1 / 2 + fCC * fAC * 0 + fCC * fBB * 1 + fCC * fBC * 1 / 2 + fCC * fCC * 0 + 0];
CCn = FullSimplify[fAA * fAA * 0 + fAA * fAB * 0 + fAA * fAC * 0 + fAA * fBB * 0 +
fAA * fBC * 0 + fAA * fCC * 0 + fAB * fAA * 0 + fAB * fAB * 0 + fAB * fAC * 0 + fAB * fBB * 0 +
fAB * fBC * 0 + fAB * fCC * 0 + fAC * fAA * 0 + fAC * fAB * 0 + fAC * fAC * d1 / 2 +
fAC * fBB * 0 + fAC * fBC * d1 / 2 + fAC * fCC * d1 + fBB * fAA * 0 + fBB * fAB * 0 +
fBB * fAC * 0 + fBB * fBB * 0 + fBB * fBC * 0 + fBB * fCC * 0 + fBC * fAA * 0 + fBC * fAB * 0 +
fBC * fAC * 1 / 4 + fBC * fBB * 0 + fBC * fBC * 1 / 4 + fBC * fCC * 1 / 2 + fCC * fAA * 0 +
fCC * fAB * 0 + fCC * fAC * 1 / 2 + fCC * fBB * 0 + fCC * fBC * 1 / 2 + fCC * fCC * 1 + 0];

```

```
In[121]:= (*Genotype frequencies after drive*)
```

```

fAAdrive = FullSimplify[AAn];
fABdrive = FullSimplify[ABn + BAn];
fACdrive = FullSimplify[ACn + CAn];
fBBdrive = FullSimplify[BBn];
fBCdrive = FullSimplify[BCn + CBn];
fCCdrive = FullSimplify[CCn];
(*check, do allele freqs sum to one?*)
FullSimplify[
  FullSimplify[fAAdrive + fABdrive + fACdrive + fBBdrive + fBCdrive + fCCdrive] /. HWE /. SUMTOONE]

```

```
Out[127]= 1
```

## Selection

```
In[128]:= wAA = 1; wAC = wAB = 1 - hs; wBB = wBC = wCC = 1 - s;
W̄ = FullSimplify[
  (wAA fAADrive + wAB fABDrive + wAC fACDrive + wBB fBBDrive + wBC fBCDrive + wCC fCCDrive);
  (*Because the C allele arises on the B background we assume
  it has the same impact on individual fitness*)
  FullSimplify[W̄ /. HWE /. SUMTOONE /. hs → 0]
Out[130]= 1 + (fB + fC) (-2 d1 fC + 2 d0 fB (-1 + fB + fC) - (fB + fC) (fB + fC - 2 d1 fC)) s
```

```
In[131]:= fAAsel = fAADrive wAA / W̄;
fABsel = fABDrive wAB / W̄;
fACsel = fACDrive wAC / W̄;
fBBsel = fBBDrive wBB / W̄;
fBCsel = fBCDrive wBC / W̄;
fCCsel = fCCDrive wCC / W̄;
fAsel = FullSimplify[fAAsel + (fABsel + fACsel) / 2];
fBsel = FullSimplify[fBBsel + (fABsel + fBCsel) / 2];
fCsel = FullSimplify[fCCsel + (fACsel + fBCsel) / 2];
ΔfA = FullSimplify[fAsel - fA];
ΔfB = FullSimplify[fBsel - fB];
ΔfC = FullSimplify[fCsel - fC];

(*Check: do genotype freqs after selection sum to one?*)
FullSimplify[fAsel + fBsel + fCsel]
```

```
Out[143]= 1
```

## Analysis

### Analysis - a standard driver [i.e. C is absent]

Note, we assume no deviation from Hardy - Weinberg for all analytical results, and therefore these answers are approximations. In the supplementary material we show that results of exact recursions are remarkably consistent from these approximate analytical solutions.

**Invasion of standard driver** - note the driver always invades when it has a recessive fitness cost. Reassuringly, this reproduces model 1.

```
In[144]:= invasionStandardDriver = Solve[
  (FullSimplify[(ΔfB /. GENOFREQS /. HWE /. SUMTOONE /. fC → 0) / fB] /. fB → 0) == 0, hs]
```

```
Out[144]= {{hs →  $\frac{-1 + 2 d0}{1 + 2 d0}$ }}
```

**Fixation of standard driver**

```
In[145]:= fixationStandardDriver = Solve[
  (FullSimplify[(ΔfB / fA /. GENOFREQS /. HWE /. SUMTOONE /. fC → 0]) /. fB → 1) == 0, s]
```

```
Out[145]:= {{s →  $\frac{1}{2} (-1 + 2 d0 + 3 hs - 2 d0 hs)$ }}
```

```
In[146]:= (*fixation of a standard recessive driver*)
fixationStandardDriver /. hs → 0
```

```
Out[146]:= {{s →  $\frac{1}{2} (-1 + 2 d0)$ }}
```

## Equilibrium

```
In[147]:= (*Equilibrium frequency of a standard driver*)
```

```
In[148]:= eqfB = Solve[(ΔfB /. GENOFREQS /. HWE /. SUMTOONE /. fC → 0) == 0, fB][[4]]
```

```
Out[148]:= {fB →  $\left( 8 d0 hs - 4 d0 s + \sqrt{-4 (1 - 2 d0 + hs + 2 d0 hs) (-4 hs + 8 d0 hs + 2 s - 4 d0 s) + (-8 d0 hs + 4 d0 s)^2} \right) / (2 (-4 hs + 8 d0 hs + 2 s - 4 d0 s))$ }
```

```
In[149]:= (*Plot of equilibrium frequency of standard driver assuming full recessivity*)
```

```
In[150]:= ContourPlot[If[fB > 1, 1 / 0, If[fB < 0, 1 / 0, fB]] /. eqfB /. hs → 0, {d0, .5, 1},
  {s, 0, 1}, PlotLegends → BarLegend[Automatic, LegendLabel → "fB*"], PlotLabel →
  "Equilibrium frequency of a standard driver with a recessive fitness cost",
  FrameLabel → {"d0 (drive of the B allele)",
  "s (selection against driver, assuming recessive fitness cost)"}]
```

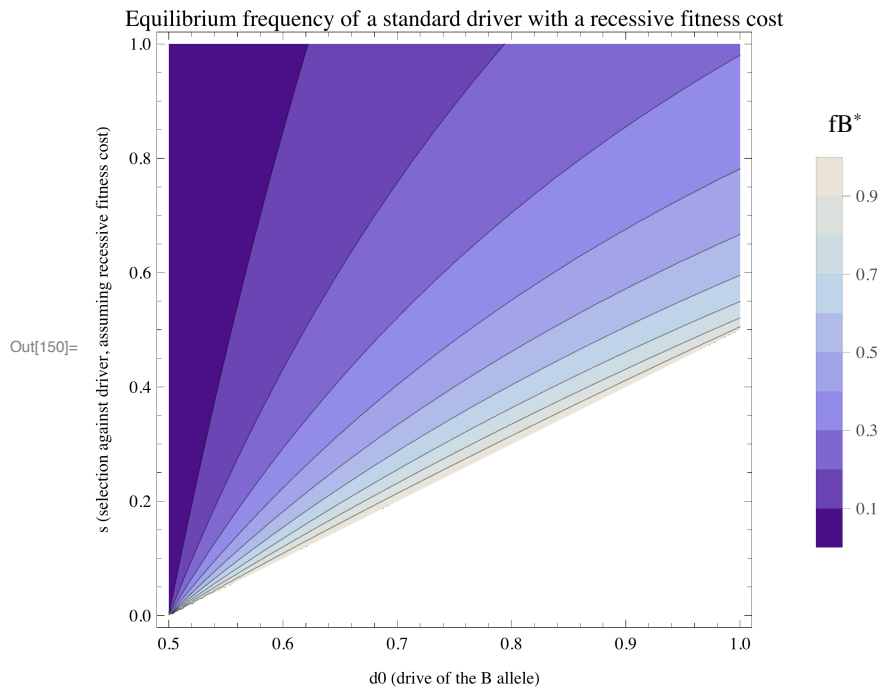

**Invasion of sperm acting drive modifier tightly linked with the**



## driver, and on the driving background

```
In[151]:= (*change in frequency of the drive modifier when rare and when alleles
at the drive locus are in drive-viability equilibrium, multiplied by
Wbar/fC [this value is always positive and will not influence the sign]*)
wbarDeltaSpermDrive = FullSimplify[
  FullSimplify[ $\bar{W} \Delta f_C / (f_C)$  /. HWE /. SUMTOONE] /. fC  $\rightarrow$  0 /. eqfB /. minormod]
```

```
Out[151]= 
$$\frac{1}{2 (1 - 2 d_0)^2 (2 h s - s)} (h s - s)$$


$$\left( -1 - h s - \sqrt{2} \sqrt{(1 + h s - 2 d_0 (2 + d_0 (-2 + s)))} (2 h s - s) + 2 d_0 (2 (-1 + d_0) (-1 + h s) + s) \right) \epsilon$$

```

```
In[152]:= (*Plotting change this change in frequency when the sperm acting locus is rare,
increases drive, and when the fitness cost of drive is fully
recessive. NOTE: This sperm enhancer of drive cannot invade*)
```

```
In[153]:= ContourPlot[
  If[fB > 1, 1 / 0, If[fB < 0.0001, 0, wbarDeltaSpermDrive]] /. eqfB /. e -> 0.01 /. hs -> 0,
  {d0, 0.5, 1}, {s, 0, 1},
  PlotLegends -> BarLegend[Automatic, LegendLabel -> "scaled ΔB+"],
  PlotLabel -> "A sperm-acting drive enhancer (the B+ haplotype)
  cannot invade\n(assuming a recessive fitness cost of drive)",
  FrameLabel -> {"d0 (drive of the B allele)",
  "s (selection against driver, assuming recessive fitness cost)"}]
```

Greater::nord : Invalid comparison with 7.49301 - 83.3298 *i* attempted. >>

Greater::nord : Invalid comparison with 7.49301 - 83.3298 *i* attempted. >>

Power::infty : Infinite expression  $\frac{1}{0}$  encountered. >>

Power::infty : Infinite expression  $\frac{1}{0.1}$  encountered. >>

Greater::nord : Invalid comparison with 3.99825 - 83.5704 *i* attempted. >>

General::stop : Further output of Greater::nord will be suppressed during this calculation. >>

Power::infty : Infinite expression  $\frac{1}{0}$  encountered. >>

General::stop : Further output of Power::infty will be suppressed during this calculation. >>

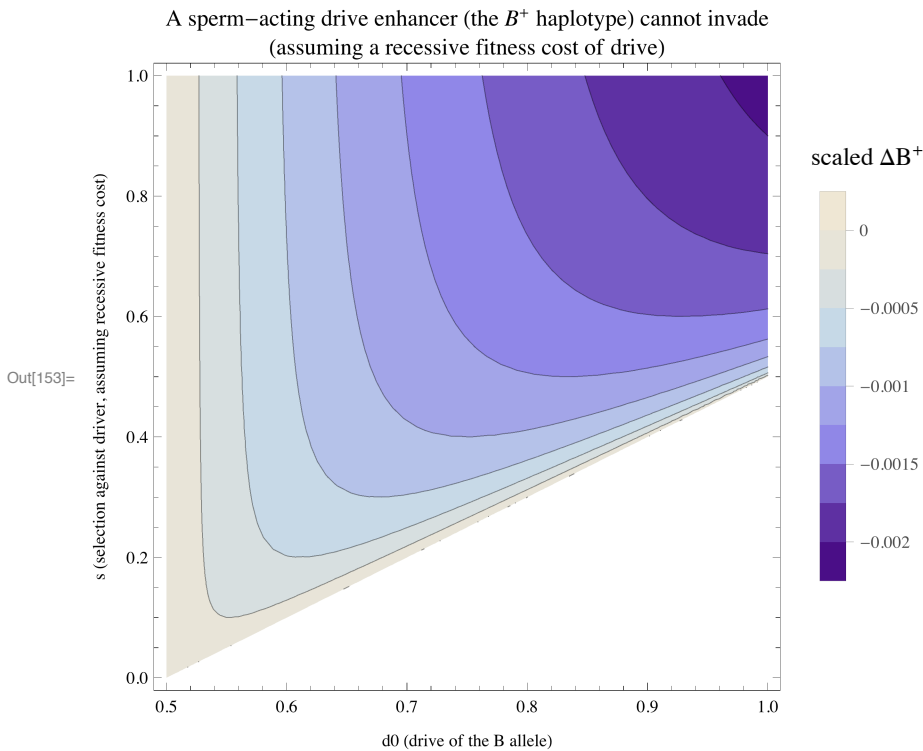

```
In[154]:= (*Plotting change this change in frequency when the sperm acting
  locus is rare and decreases drive, and when the fitness cost of
  drive is fully recessive. NOTE: This sperm suppressor always invades*)
```

```
In[155]:= ContourPlot[
  If[fB > 1, 1 / 0, If[fB < 0.0001, 0, wbarDeltaSpermDrive]] /. eqfB /. e -> -0.01 /. hs -> 0,
  {d0, 0.5, 1}, {s, 0, 1},
  PlotLegends -> BarLegend[Automatic, LegendLabel -> "scaled ΔB-"],
  PlotLabel -> "A sperm-acting drive suppressor (the B- haplotype)
    always invades\n(assuming a recessive fitness cost of drive)",
  FrameLabel -> {"d0 (drive of the B allele)",
    "s (selection against driver, assuming recessive fitness cost)"}]
```

Greater::nord : Invalid comparison with 7.49301 - 83.3298 i attempted. >>

Greater::nord : Invalid comparison with 7.49301 - 83.3298 i attempted. >>

Power::infty : Infinite expression  $\frac{1}{0}$  encountered. >>

Power::infty : Infinite expression  $\frac{1}{0.1}$  encountered. >>

Greater::nord : Invalid comparison with 3.99825 - 83.5704 i attempted. >>

General::stop : Further output of Greater::nord will be suppressed during this calculation. >>

Power::infty : Infinite expression  $\frac{1}{0}$  encountered. >>

General::stop : Further output of Power::infty will be suppressed during this calculation. >>

A sperm-acting drive suppressor (the B<sup>-</sup> haplotype) always invades  
(assuming a recessive fitness cost of drive)

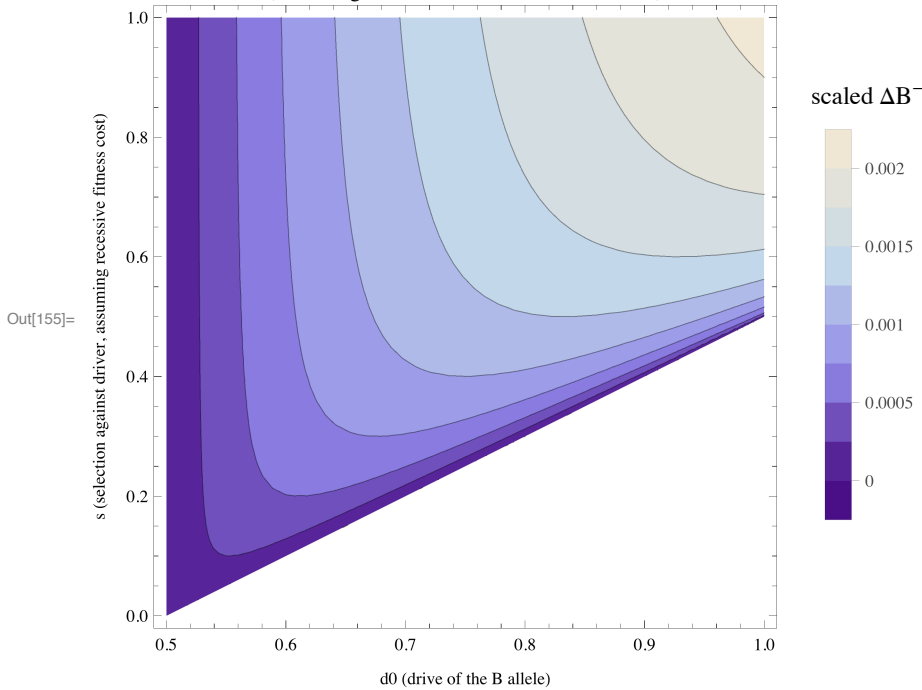

```
In[156]:= (*Plotting change this change in frequency when hte extent
of drive is mild [d0 = .6] and the sperm acting locus is rare
and increase drive. NOTE: This sperm enhancer never invades*)
ContourPlot[(If[fB > 1, 1 / 0, If[fB < 0.000001, 0, wbarDeltaSpermDrive]] /. eqfB /.
  ε → 0.01 /. d0 → .6), {s, 0, 1}, {hs, 0, 1},
  PlotLegends → BarLegend[Automatic, LegendLabel → "scaled ΔB+"], PlotLabel →
  "A sperm-acting drive enhancer (the B+ haplotype) cannot invade\n(assuming
  drive-selection equilibrium of a modest driver, d0 = .6)",
  FrameLabel → {"s (selection against drive homozygotes)",
  "hs (selection against drive heterozygotes)"}]
```

Power::infy : Infinite expression  $\frac{1}{0}$  encountered. >>

Power::infy : Infinite expression  $\frac{1}{0}$  encountered. >>

Power::infy : Infinite expression  $\frac{1}{0}$  encountered. >>

General::stop : Further output of Power::infy will be suppressed during this calculation. >>

Greater::nord : Invalid comparison with 3. + 63.2179 i attempted. >>

Greater::nord : Invalid comparison with 3. + 63.2179 i attempted. >>

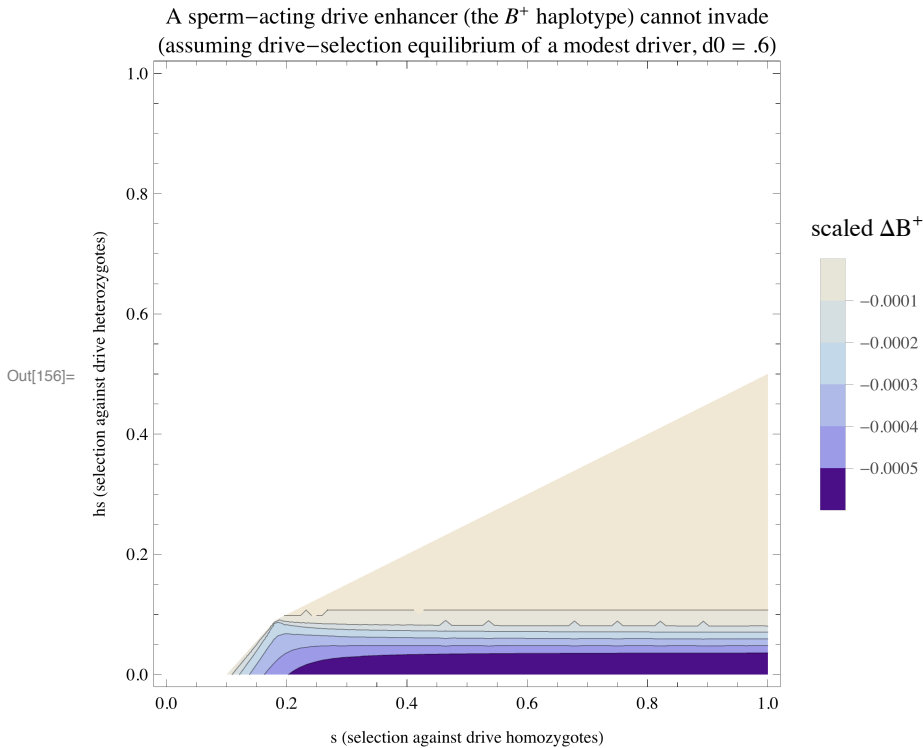

```
In[157]:= (*Plotting change this change in frequency when hte extent of
drive is mild [d0 = .98] and the sperm acting locus is rare and
increase drive. NOTE: This sperm enhancer never invades*)ContourPlot[
(If[fb > 1, 1 / 0, If[fb <= 0.001, -0.000000001, wbarDeltaSpermDrive]] /. eqfB /.
ε → 0.01 /. d0 → .98), {s, 0, 1}, {hs, 0, 1},
PlotLegends → BarLegend[Automatic, LegendLabel → "scaled ΔB+"], PlotLabel →
"A sperm-acting drive enhancer (the B+ haplotype) cannot invade\n(assuming
drive-selection equilibrium of a strong driver, d0 = .98)",
FrameLabel → {"s (selection against drive homozygotes)",
"hs (selection against drive heterozygotes)"}]
```

Power::infty : Infinite expression  $\frac{1}{0}$  encountered. >>

Greater::nord : Invalid comparison with 1.02083 - 2.442 i attempted. >>

Greater::nord : Invalid comparison with 1.02083 - 2.442 i attempted. >>

Power::infty : Infinite expression  $\frac{1}{0}$  encountered. >>

Power::infty : Infinite expression  $\frac{1}{0.1}$  encountered. >>

General::stop : Further output of Power::infty will be suppressed during this calculation. >>

Greater::nord : Invalid comparison with 1.02083 - 1.56808 i attempted. >>

General::stop : Further output of Greater::nord will be suppressed during this calculation. >>

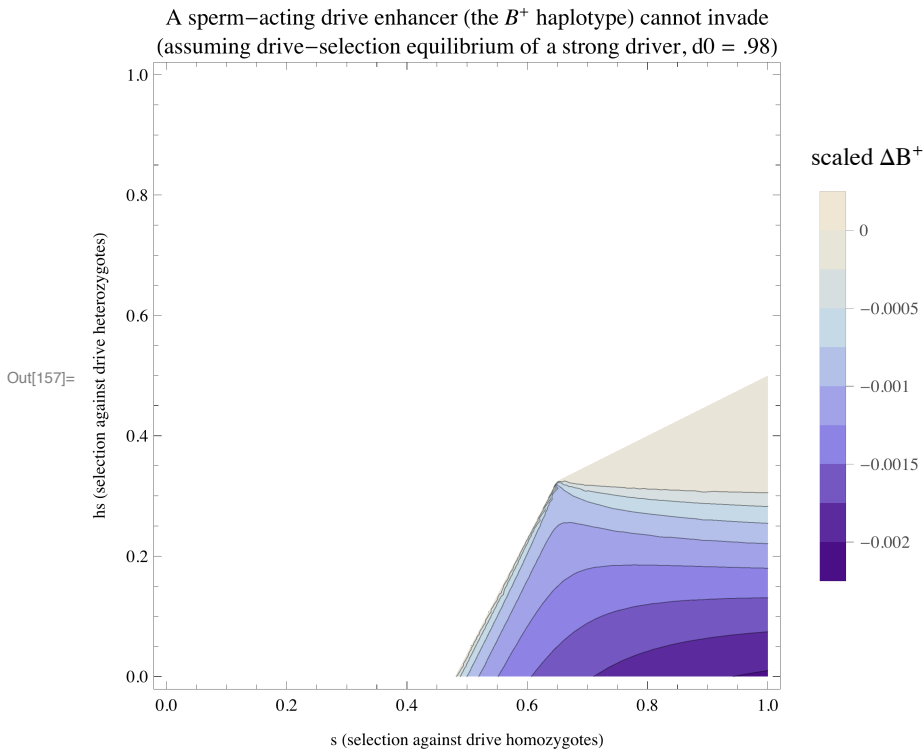

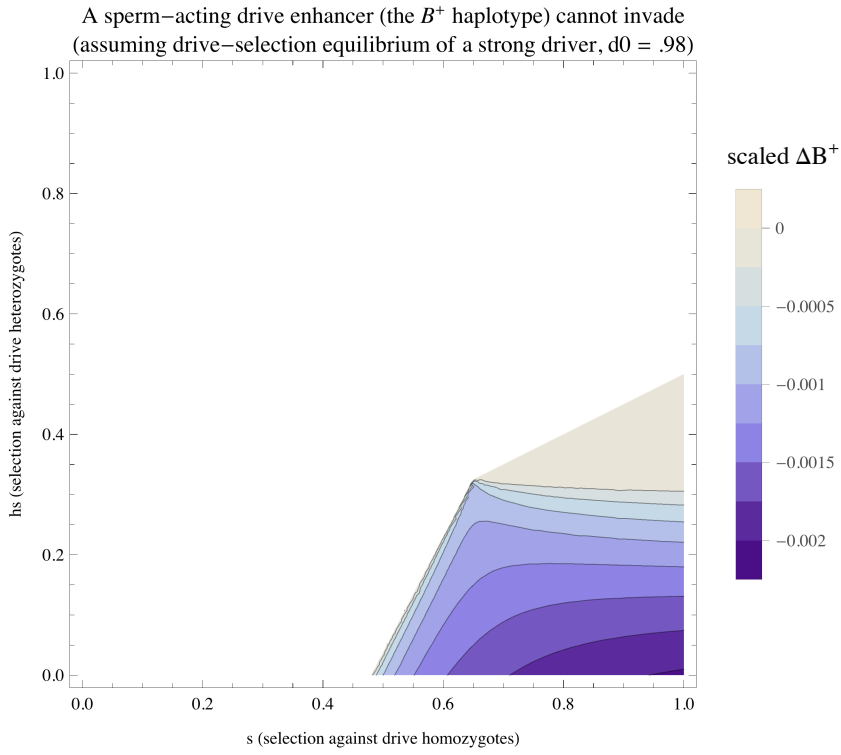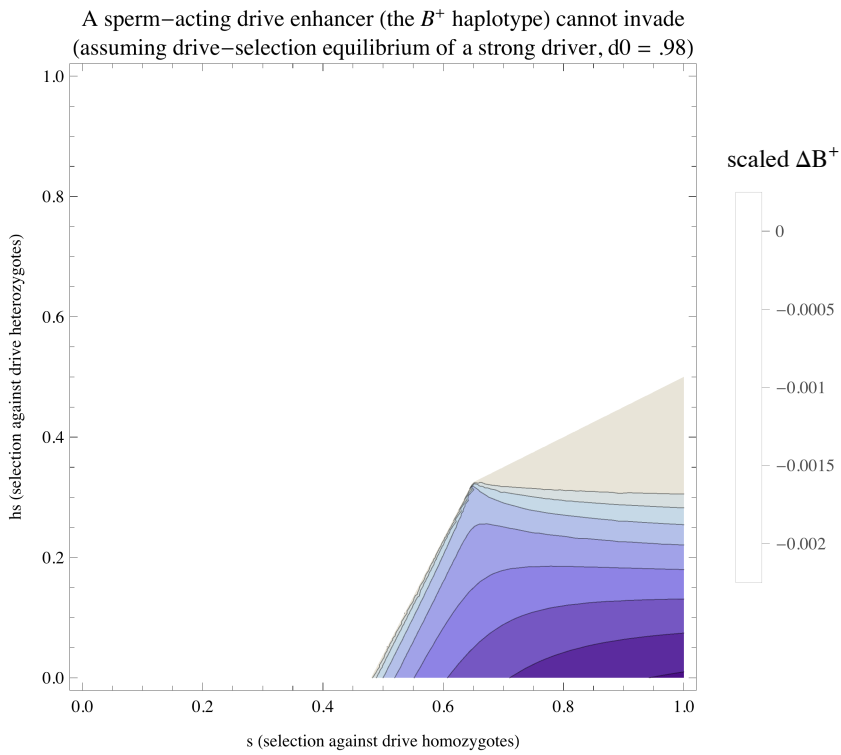

## Replacement of traditional driver by sperm acting drive suppressor tightly linked with the driver, and on the driving background

Equilibrium frequency of drive suppressor

```
In[158]:= eqfC = Solve[(FullSimplify[ΔfC /. HWE /. SUMTOONE /. minormod /. fB → 0]) == 0, fC][[4]];
```

```
In[159]:= (*Equilibrium frequency of a linked, coupled,
drive suppressor when the fitness costs of drive are recessive*)
```

```
In[160]:= ContourPlot[If[fC < 1 && fC > 0, (fC), 1 / 0] /. eqfC /. hs → 0 /. ε → -.001,
{d0, .5, 1}, {s, 0, 1}, PlotLegends → BarLegend[Automatic, LegendLabel → "fB- *"],
PlotLabel → "Equilibrium freq. of sperm-acting drive suppressor (the B-
haplotype)\n(assuming an initial complete driver, d0 = 1)", FrameLabel →
{"d0 (drive of the B allele)", "s (selection against drive homozygotes)"}]
```

Equilibrium freq. of sperm-acting drive suppressor (the B<sup>-</sup> haplotype)  
(assuming an initial complete driver, d0 = 1)

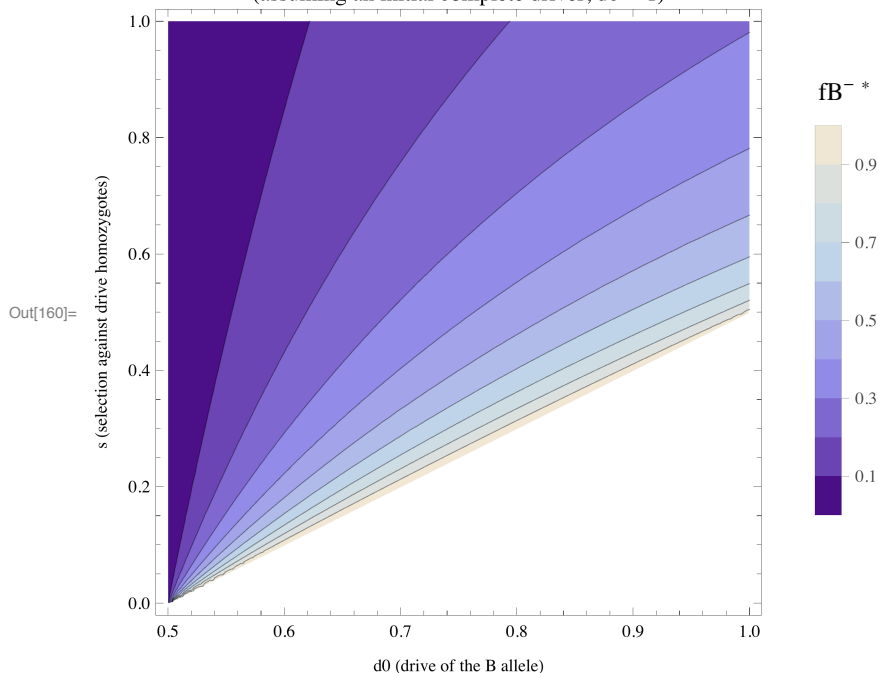

```
In[161]:= (*Equilibrium frequency of a linked, coupled,
drive suppressor when drive is complete*)
```

```
In[162]:= ContourPlot[If[fC < 1 && fC > 0, (fC), 1 / 0] /. eqfC /. hs -> 0 /. ε -> -.001 /. d0 -> 1,
  {s, 0, 1}, {hs, 0, 1}, PlotLegends -> BarLegend[Automatic, LegendLabel -> "fB- *"],
  PlotLabel -> "Equilibrium freq. of a sperm-acting drive suppressor (the
    B- haplotype) \n(assuming an initial complete driver, d0 = 1)",
  FrameLabel -> {"s (selection against drive homozygotes)",
    "hs (selection against drive heterozygotes)"}]
```

Power::infy : Infinite expression  $\frac{1}{0}$  encountered. >>

Less::nord : Invalid comparison with  $1.00802 - 2.45019 i$  attempted. >>

Greater::nord : Invalid comparison with  $1.00802 - 2.45019 i$  attempted. >>

Less::nord : Invalid comparison with  $1.00802 - 2.45019 i$  attempted. >>

Greater::nord : Invalid comparison with  $1.00802 - 2.45019 i$  attempted. >>

Power::infy : Infinite expression  $\frac{1}{0}$  encountered. >>

Power::infy : Infinite expression  $\frac{1}{0.1}$  encountered. >>

General::stop : Further output of Power::infy will be suppressed during this calculation. >>

Less::nord : Invalid comparison with  $1.00451 - 1.58082 i$  attempted. >>

General::stop : Further output of Less::nord will be suppressed during this calculation. >>

Greater::nord : Invalid comparison with  $1.00451 - 1.58082 i$  attempted. >>

General::stop : Further output of Greater::nord will be suppressed during this calculation. >>

Equilibrium freq. of a sperm-acting drive suppressor (the B<sup>-</sup> haplotype)  
(assuming an initial complete driver, d0 = 1)

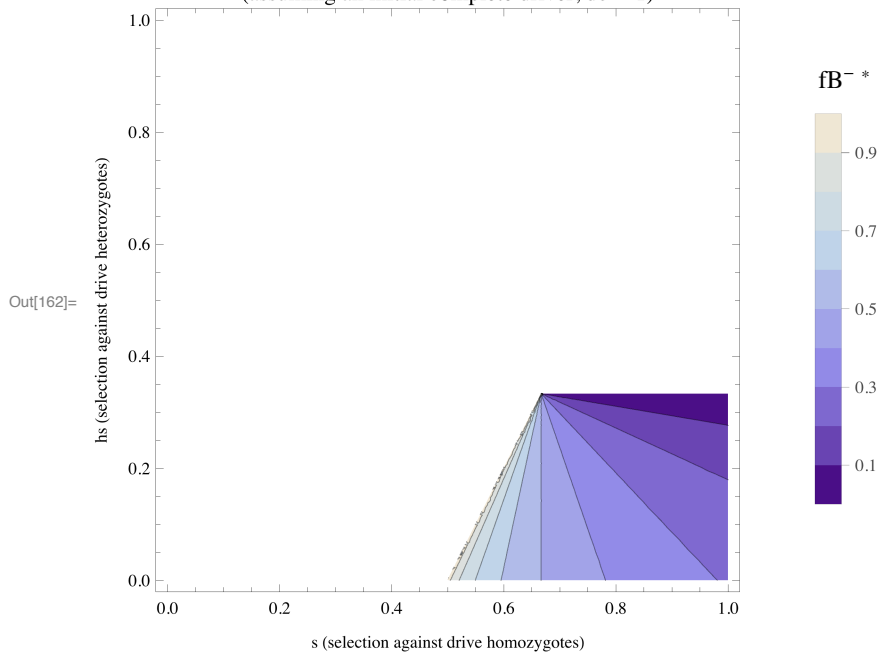

**Equilibrium frequency of drive/sperm acting suppressor haplotype is often less than that of the standard driver it replaces.**



```

In[163]:= (*Difference in equilibrium frequency of the B- and B haplotypes*)
ContourPlot[
  If[fC < 1 && fB < 1 && fC > 0 && fB > 0, (fC - fB), 1 / 0] /. eqfB /. eqfC /. hs -> 0 /.
  ε -> -.001, {d0, .5, 1}, {s, 0, 1},
  PlotLegends -> BarLegend[Automatic, LegendLabel -> "fB- * - fB*"], PlotLabel ->
  "Difference in equilibrium frequency of a drive suppressor (B- haplotype)\n and
  the driver it replaces (assuming a recessive cost of the drive allele)",
  FrameLabel -> {"d0 (drive of the B allele)",
  "s (selection against drive homozygotes)"}]

```

Difference in equilibrium frequency of a drive suppressor (B<sup>-</sup> haplotype) and the driver it replaces (assuming a recessive cost of the drive allele)

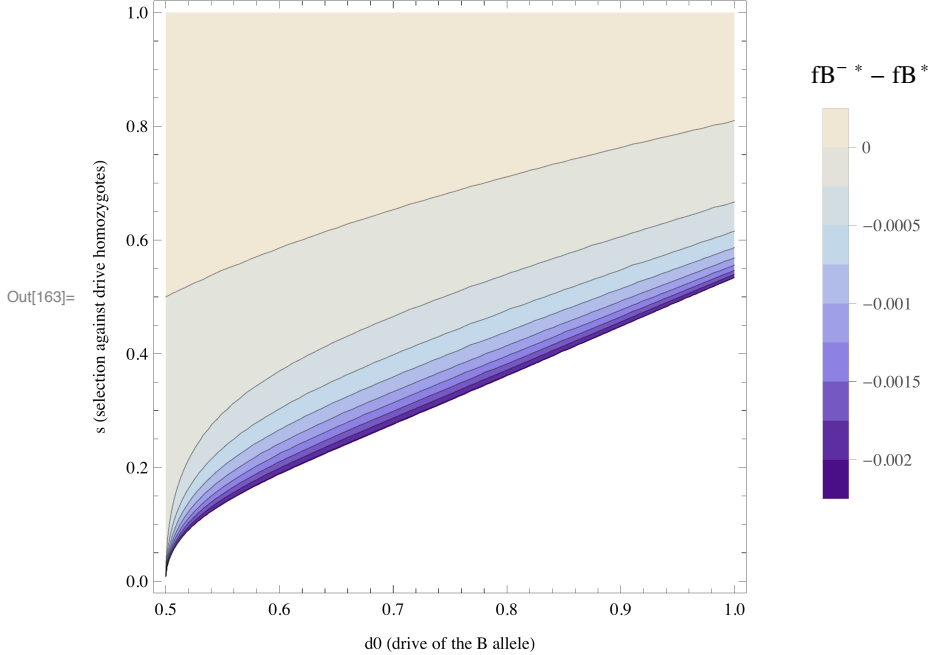

```
In[164]:= ContourPlot[
  If[fC < 1 && fB < 1 && fC > 0 && fB > 0, (fC - fB), 1 / 0] /. eqfB /. eqfC /. hs → (s / 4) /.
  ε → -.001, {d0, .5, 1}, {s, 0, 1},
  PlotLegends → BarLegend[Automatic, LegendLabel → "fB- * - fB*"], PlotLabel →
  "Difference in equilibrium frequency of a drive suppressor (B- haplotype)\n
  and the driver it replaces (assuming a heterozygote cost, hs = s/4)",
  FrameLabel → {"d0 (drive of the B allele)",
  "s (selection against drive homozygotes)"}]
```

Difference in equilibrium frequency of a drive suppressor (B<sup>-</sup> haplotype)  
and the driver it replaces (assuming a heterozygote cost, hs = s/4)

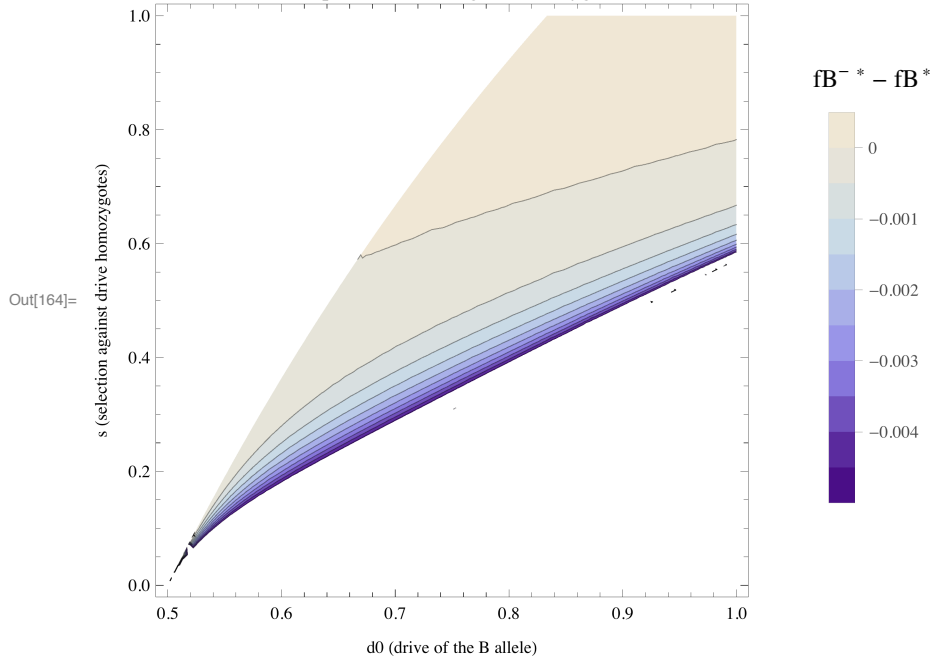

```
In[165]:= (*change in frequency of a rare traditional driver when the drive-
sperm suppressor haplotype and the ondriving hplotype
are at drive selection equilibrium, mutliplied by
Wbar/fC [this value is always positive and will not influence the sign]*)
wbarDeltaTradDrive = FullSimplify[
  FullSimplify[ $\bar{w} \Delta f_B / (f_B)$  /. HWE /. SUMTOONE] /. fB → 0 /. eqfC /. minormod];
```

```
In[166]:= (*Plotting the change in frequency of a rare traditional
driving haplotype when the sperm drive suppressor is at drive
selection balance. ASSUMING the fitness cost of drive is fully
recessive. NOTE: This sperm enhancer of drive cannot invade*)
```

```
In[167]:= ContourPlot[
  If[fC > 1, 1 / 0, If[fC < 0.0001, 0, wbarDeltaTradDrive]] /. eqfC /. ε → -0.001 /. hs → 0,
  {d0, 0.5, 1}, {s, 0, 1},
  PlotLegends → BarLegend[Automatic, LegendLabel → "scaled ΔB"],
  PlotLabel → "A fixed drive suppressor (B- haplotype) cannot be displaced by \n a
    traditional driver (assuming a recessive fitness cost of drive)",
  FrameLabel → {"d0 (drive of the B allele)",
    "s (selection against driver, assuming recessive fitness cost)"}]
```

Power::infty : Infinite expression  $\frac{1}{0}$  encountered. >>

Greater::nord : Invalid comparison with 53.7184 - 64.9128 i attempted. >>

Greater::nord : Invalid comparison with 53.7184 - 64.9128 i attempted. >>

Power::infty : Infinite expression  $\frac{1}{0}$  encountered. >>

Power::infty : Infinite expression  $\frac{1}{0.1}$  encountered. >>

General::stop : Further output of Power::infty will be suppressed during this calculation. >>

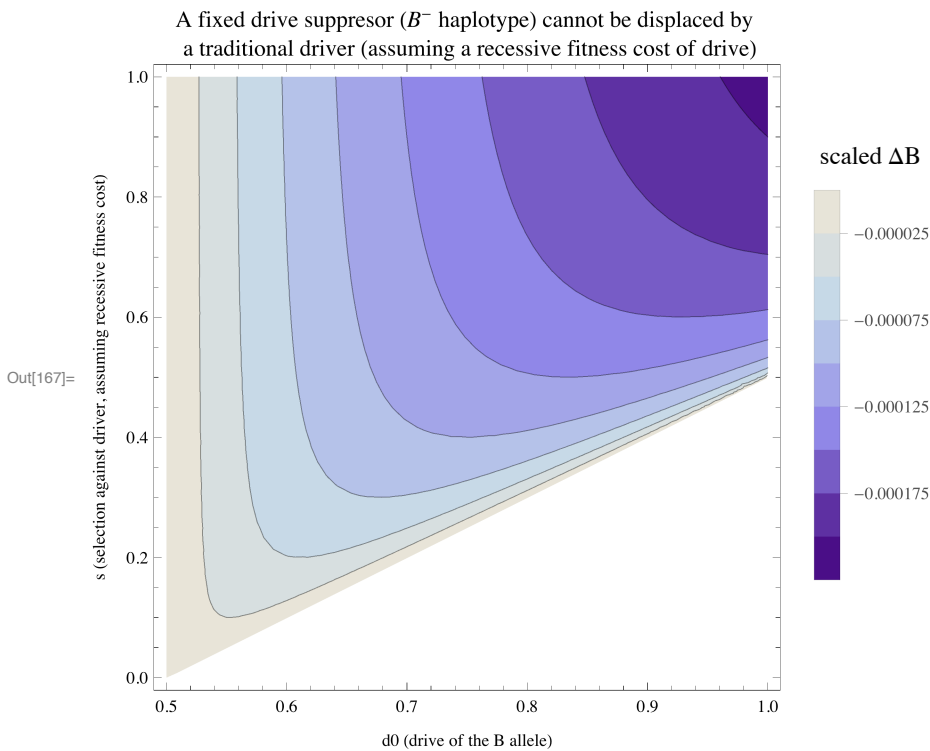

```
In[168]:= (*Plotting the change in frequency of a rare traditional
  driving haplotype when the sperm drive suppressor is at drive
  selection balance. ASSUMING a fitness cost of drive in homozygotes
  (hs→s/4). NOTE: This sperm enhancer of drive cannot invade*)
```

```
In[169]:= ContourPlot[
  If[fC > 1, 1 / 0, If[fC < 0.0001, 0, wbarDeltaTradDrive]] /. eqfC /. ε → -0.001 /.
  hs → s / 4, {d0, 0.5, 1}, {s, 0, 1},
  PlotLegends → BarLegend[Automatic, LegendLabel → "scaled ΔB"],
  PlotLabel → "A fixed sperm-acting drive suppressor cannot be displaced
    by a traditional \n(assuming a recessive fitness cost of drive)",
  FrameLabel → {"d0 (drive of the B allele)",
    "s (selection against driver, assuming recessive fitness cost)"}]
```

Power::infy : Infinite expression  $\frac{1}{0}$  encountered. >>

Greater::nord : Invalid comparison with 104.123 - 58.7778 i attempted. >>

Greater::nord : Invalid comparison with 104.123 - 58.7778 i attempted. >>

Power::infy : Infinite expression  $\frac{1}{0}$  encountered. >>

Power::infy : Infinite expression  $\frac{1}{0.1}$  encountered. >>

General::stop : Further output of Power::infy will be suppressed during this calculation. >>

Greater::nord : Invalid comparison with 69.1031 - 97.0611 i attempted. >>

General::stop : Further output of Greater::nord will be suppressed during this calculation. >>

```
ContourPlot[
  If[fC > 1, 1 / 0, If[fC < 0.0001, 0, wbarDeltaTradDrive]] /. eqfC /. ε → -0.001 /. d0 → 1,
  {s, 0, 1}, {hs, 0, 1}, PlotLegends → BarLegend[Automatic, LegendLabel → "scaled ΔB"],
  PlotLabel → "A fixed sperm-acting drive suppressor cannot
    be displaced by a traditional \n(assuming perfect drive)",
  FrameLabel → {"s (selection against drive homozygotes)",
    "hs (selection against drive heterozygotes)"}]
```

A fixed sperm-acting drive suppressor cannot be displaced by a traditional  
(assuming perfect drive)

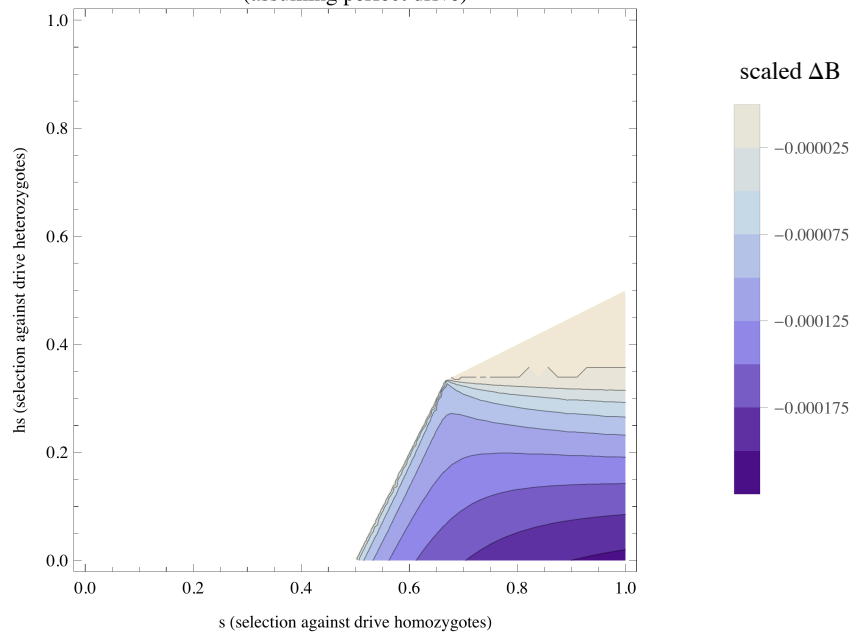

## Model 5. Female drive depends on sperm haplotype (two tightly linked, loci in repulsion phase)

We have one locus with two alleles, A (non-driving) and B (traditional driver), as well as a tightly linked locus where one allele modifies drive. This tightly-linked locus is on the A background. Assuming no recombination this functions as a third allele, C.

When C increases drive in heterozygous females it fertilizes, it is a drive enhancer (the A+ allele [not discussed in our ms]).

When C decreases drive in heterozygous females it fertilizes, it is a drive suppressor (the A- allele in our ms).

---

### Setup

```
ClearAll["Global`*"]
fA = .
fAA = .
fAB = .
fAC = .
fBB = .
fBC = .
fCC = .
minormod = {d1 -> d0 + ε}
(*assuming the sperm acting modifier additively increases drive by epsilon*);
SUMTOONE = {fA -> 1 - (fB + fC)};
HWE =
  {fAA -> fA^2, fAB -> 2 fA fB, fAC -> 2 fA fC, fBB -> fB^2, fBC -> 2 fB fC, fCC -> fC^2};
GENOFREQS = {fA -> fAA + fAB / 2 + fAC / 2,
  fB -> fBB + fAB / 2 + fBC / 2, fC -> fCC + fBC / 2 + fBC / 2};
```

---

### Drive

```
(*Here we calculate all genotypes after drive. For book-
keeping purposes we distinguish between reciprocal homozygotes,
but remove this distinction belowsum them below*)
```

```
AAn =
FullSimplify[fAA * fAA * 1 + fAA * fAB * 1 / 2 + fAA * fAC * 1 / 2 + fAA * fBB * 0 + fAA * fBC * 0 +
  fAA * fCC * 0 + fAB * fAA * (1 - d0) + fAB * fAB * (1 - d0) / 2 + fAB * fAC * (1 - d0) / 2 +
  fAB * fBB * 0 + fAB * fBC * 0 + fAB * fCC * 0 + fAC * fAA * 1 / 2 + fAC * fAB * 1 / 4 +
```



```

fAB * fCC * 0 + fAC * fAA * 0 + fAC * fAB * 0 + fAC * fAC * 1 / 4 + fAC * fBB * 0 + fAC * fBC * 1 / 4 +
fAC * fCC * 1 / 2 + fBB * fAA * 0 + fBB * fAB * 0 + fBB * fAC * 0 + fBB * fBB * 0 +
fBB * fBC * 0 + fBB * fCC * 0 + fBC * fAA * 0 + fBC * fAB * 0 + fBC * fAC * (1 - d1) / 2 +
fBC * fBB * 0 + fBC * fBC * (1 - d1) / 2 + fBC * fCC * (1 - d1) + fCC * fAA * 0 +
fCC * fAB * 0 + fCC * fAC * 1 / 2 + fCC * fBB * 0 + fCC * fBC * 1 / 2 + fCC * fCC * 1 + 0];

(*Genotype frequencies after drive*)
fAA_Drive = FullSimplify[AA_n];
fAB_Drive = FullSimplify[AB_n + BA_n];
fAC_Drive = FullSimplify[AC_n + CA_n];
fBB_Drive = FullSimplify[BB_n];
fBC_Drive = FullSimplify[BC_n + CB_n];
fCC_Drive = FullSimplify[CC_n];
(*check, do allele freqs sum to one?*)
FullSimplify[
  FullSimplify[fAA_Drive + fAB_Drive + fAC_Drive + fBB_Drive + fBC_Drive + fCC_Drive] /. HWE /. SUMTOONE]
1

```

## Selection

```

wAA = wAC = wCC = 1; wAB = wBC = 1 - hs; wBB = 1 - s;
W_bar = FullSimplify[
  (wAA fAA_Drive + wAB fAB_Drive + wAC fAC_Drive + wBB fBB_Drive + wBC fBC_Drive + wCC fCC_Drive)];
(*Because the C allele arises on the B background we assume
it has the same impact on individual fitness*)
FullSimplify[W_bar /. HWE /. SUMTOONE /. hs -> 0]
1 + (2 d0 (-1 + fB) - fB) fB^2 s

fAA_Sel = fAA_Drive wAA / W_bar;
fAB_Sel = fAB_Drive wAB / W_bar;
fAC_Sel = fAC_Drive wAC / W_bar;
fBB_Sel = fBB_Drive wBB / W_bar;
fBC_Sel = fBC_Drive wBC / W_bar;
fCC_Sel = fCC_Drive wCC / W_bar;
fA_Sel = FullSimplify[fAA_Sel + (fAB_Sel + fAC_Sel) / 2];
fB_Sel = FullSimplify[fBB_Sel + (fAB_Sel + fBC_Sel) / 2];
fC_Sel = FullSimplify[fCC_Sel + (fAC_Sel + fBC_Sel) / 2];
ΔfA = FullSimplify[fA_Sel - fA];
ΔfB = FullSimplify[fB_Sel - fB];
ΔfC = FullSimplify[fC_Sel - fC];

(*Check: do genotype freqs after selection sum to one?*)
FullSimplify[fA_Sel + fB_Sel + fC_Sel]
1

FullSimplify[W_bar fAC_Sel /. HWE /. SUMTOONE]
2 (-1 + (-1 + d0 + d1) fB) fC (-1 + fB + fC)

```

## Analysis

### Analysis - a standard driver [i.e. C is absent]

THIS IS THE SAME AS ABOVE, AND WE REENTER IT SIMPLY TO LOAD RESULTS INTO MEMORY. PLOTS ARE NOT RECREATED

```
invasionStandardDriver = Solve[
  (FullSimplify[(ΔfB /. GENOFREQS /. HWE /. SUMTOONE /. fC → 0) / fB] /. fB → 0) == 0,
  hs];
fixationStandardDriver = Solve[
  (FullSimplify[(ΔfB / fA /. GENOFREQS /. HWE /. SUMTOONE /. fC → 0)] /. fB → 1) == 0,
  s];
eqfB = Solve[(ΔfB /. GENOFREQS /. HWE /. SUMTOONE /. fC → 0) == 0, fB][[4]];
```

### Invasion of sperm acting drive modifier tightly linked with the driver, on the non-driving background

(\*change in frequency of the drive modifier when rare and when alleles at the drive locus are in drive-viability equilibrium, multiplied by  $\bar{w}_B/f_C^2$  [this value is always positive and will not influence the sign]\*)

```
wbarDeltaSpermDriveRecessive = FullSimplify[
  (FullSimplify[ $\bar{w} \Delta f_C / (f_C^2)$  /. HWE /. SUMTOONE /. eqfB /. hs → 0]) /. minormod]
  (
$$\frac{-2 d_0 s + \sqrt{2} \sqrt{(-1 + 2 d_0 (2 + d_0 (-2 + s))) s}}{2 (-1 + 2 d_0) s} \in$$
)
```



```
ContourPlot[
  If[fB > 1, 1 / 0, If[fB < 0.0001, 0, wbarDeltaSpermDriveRecessive]] /. eqfB /.
  ε → -0.01 /. hs → 0, {d0, 0.5, 1}, {s, 0, 1},
  PlotLegends → BarLegend[Automatic, LegendLabel → "scaled ΔA-"],
  PlotLabel → "A sperm-acting drive suppressor linked\n to the nondriving allele
  (the A- haplotype)\n invades when the cost of drive is fully recessive",
  FrameLabel → {"d0 (drive of the B allele)",
  "s (selection against driver, assuming recessive fitness cost)"}]
```

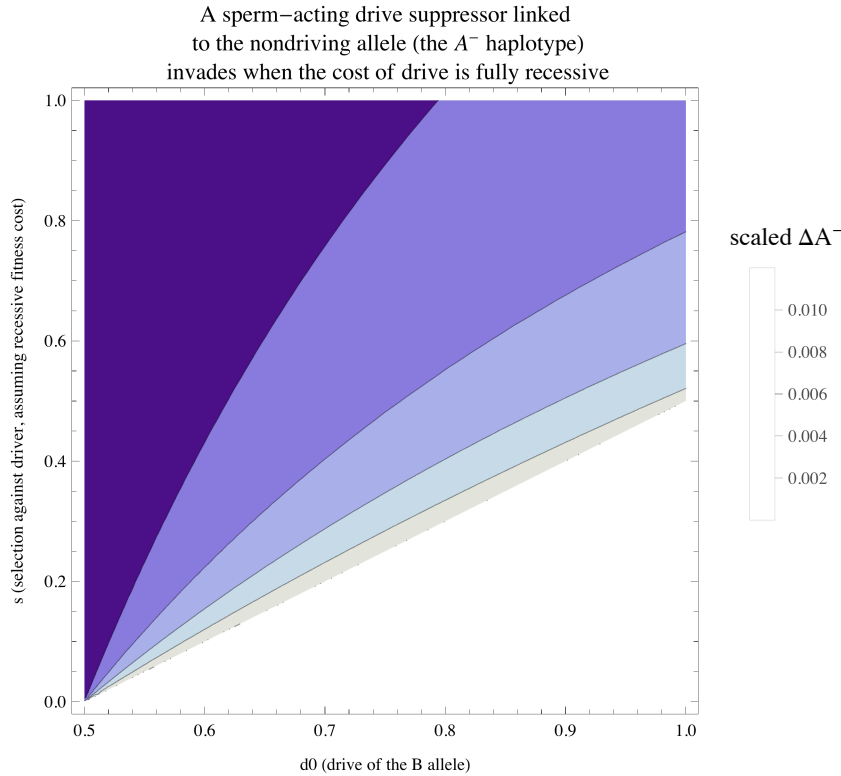

(\*change in frequency of the drive modifier when rare and when alleles at the drive locus are in drive-viability equilibrium, multiplied by  $\bar{w}/f_C$  [this value is always positive and will not influence the sign]\*)

```
wbarDeltaSpermDrive = FullSimplify[
  FullSimplify[ $\bar{w} \Delta f_C / (f_C) /. HWE /. SUMTOONE$ ] /. fC → 0 /. eqfB /. minormod]
-  $\frac{1}{2 (1 - 2 d_0)^2 (2 h s - s)} h s (-1 - h s - \sqrt{2} \sqrt{(1 + h s - 2 d_0 (2 + d_0 (-2 + s))) (2 h s - s) + 2 d_0 (2 (-1 + d_0) (-1 + h s) + s)}) \epsilon$ 
```

(\*Plotting change this change in frequency when the sperm acting locus is rare, increases drive, and when the fitness cost of drive is fully recessive. NOTE: This sperm enhancer of drive cannot invade\*)

```

ContourPlot[
  If[fB > 1, 1 / 0, If[fB < 0.0001, 0, wbarDeltaSpermDrive]] /. eqfB /. e -> -0.01 /.
  hs -> s / 4, {d0, 0.5, 1}, {s, 0, 1},
  PlotLegends -> BarLegend[Automatic, LegendLabel -> "scaled ΔA-"], PlotLabel ->
  "Invasion of a sperm-acting drive suppressor linked to the nondriving\n allele
  (the A- haplotype), assuming the cost of drive is not fully recessive.",
  FrameLabel -> {"d0 (drive of the B allele)",
  "s (selection against driver, assuming het fitness cost,  $hs = \frac{s}{4}$ )"}]

```

Invasion of a sperm-acting drive suppressor linked to the nondriving allele (the A<sup>-</sup> haplotype), assuming the cost of drive is not fully recessive.

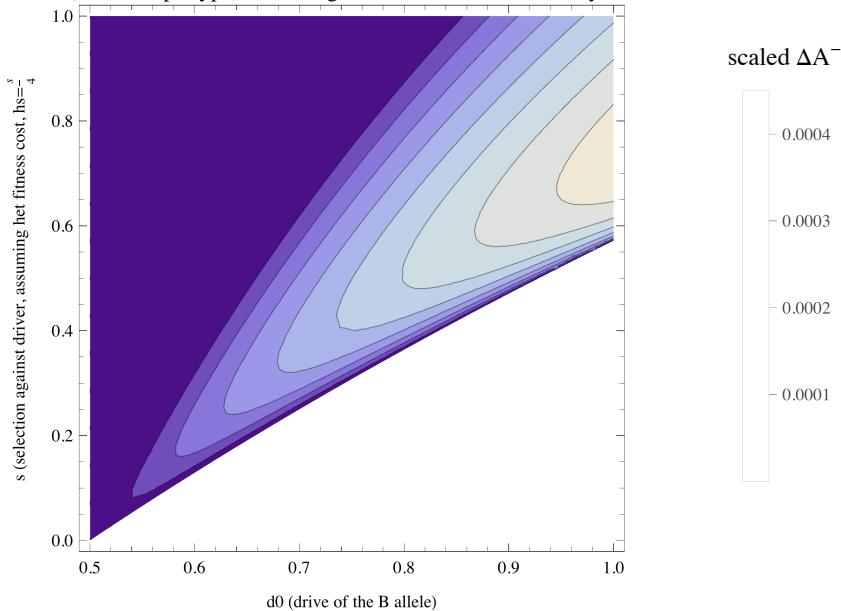

## Model 6. Female drive depends on sperm genotype at an unlinked locus

In addition to our one locus with two alleles, A (non-driving) and B (traditional driver), we have a second locus with loci, E and F. We are concerned with the invasion and fixation of the F allele, which acts to modify drive when it fertilizes a heterozygote. Drive of the B allele is  $d_0$ , but changes to  $d_1$  when fertilized by an 'F' bearing sperm

## Setup

```

ClearAll["Global`*"]

fA = .; fB = .; fE = .; fF = .;
fAE = fA fE + D;
fAF = fA fF - D;
fBE = fB fE - D;
fBF = fB fF + D;
randomHaps = {fAAEE → FullSimplify[fAE fAE],
  fABEE → FullSimplify[2 fAE fBE], fBBEE → FullSimplify[fBE fBE],
  fAAEF → FullSimplify[2 fAE fAF], fABEF → FullSimplify[2 (fAE fBF + fAF fBE)],
  fBBEF → FullSimplify[2 fBE fBF], fAAFF → FullSimplify[fAF fAF],
  fABFF → FullSimplify[2 fAF fBF], fBBFF → FullSimplify[fBF fBF]};
sum2one = {fA → 1 - fB, fE → 1 - fF}
minormod = {d1 → d0 + ε}
(*assuming the sperm acting modifier additively increases drive by epsilon*)
{fA → 1 - fB, fE → 1 - fF}

```

## Drive

```

fAAEEdrive = FullSimplify[
  fAAEE * fAAEE * 1 + fAAEE * fABEE * 1 / 2 + fAAEE * fBBEE * 0 + fAAEE * fAAEF * 1 / 2 +
  fAAEE * fABEF * 1 / 4 + fAAEE * fBBEF * 0 + fAAEE * fAAFF * 0 + fAAEE * fABFF * 0 +
  fAAEE * fBBFF * 0 + fABEE * fAAEE * (1 - d0) + fABEE * fABEE * (1 - d0) / 2 + fABEE * fBBEE * 0 +
  fABEE * fAAEF * (1 - d0) / 2 + fABEE * fABEF * (1 - d0) / 4 + fABEE * fBBEF * 0 +
  fABEE * fAAFF * 0 + fABEE * fABFF * 0 + fABEE * fBBFF * 0 + fBBEE * fAAEE * 0 +
  fBBEE * fABEE * 0 + fBBEE * fBBEE * 0 + fBBEE * fAAEF * 0 + fBBEE * fABEF * 0 +
  fBBEE * fBBEF * 0 + fBBEE * fAAFF * 0 + fBBEE * fABFF * 0 + fBBEE * fBBFF * 0 +
  fAAEF * fAAEE * 1 / 2 + fAAEF * fABEE * 1 / 4 + fAAEF * fBBEE * 0 + fAAEF * fAAEF * 1 / 4 +
  fAAEF * fABEF * 1 / 8 + fAAEF * fBBEF * 0 + fAAEF * fAAFF * 0 + fAAEF * fABFF * 0 +
  fAAEF * fBBFF * 0 + fABEF * fAAEE * (1 - d0) / 2 + fABEF * fABEE * (1 - d0) / 4 +
  fABEF * fBBEE * 0 + fABEF * fAAEF * (1 - d0) / 4 + fABEF * fABEF * (1 - d0) / 8 +
  fABEF * fBBEF * 0 + fABEF * fAAFF * 0 + fABEF * fABFF * 0 + fABEF * fBBFF * 0 +
  fBBEF * fAAEE * 0 + fBBEF * fABEE * 0 + fBBEF * fBBEE * 0 + fBBEF * fAAEF * 0 +
  fBBEF * fABEF * 0 + fBBEF * fBBEF * 0 + fBBEF * fAAFF * 0 + fBBEF * fABFF * 0 +
  fBBEF * fBBFF * 0 + fAAFF * fAAEE * 0 + fAAFF * fABEE * 0 + fAAFF * fBBEE * 0 +
  fAAFF * fAAEF * 0 + fAAFF * fABEF * 0 + fAAFF * fBBEF * 0 + fAAFF * fAAFF * 0 +
  fAAFF * fABFF * 0 + fAAFF * fBBFF * 0 + fABFF * fAAEE * 0 + fABFF * fABEE * 0 +
  fABFF * fBBEE * 0 + fABFF * fAAEF * 0 + fABFF * fABEF * 0 + fABFF * fBBEF * 0 +
  fABFF * fAAFF * 0 + fABFF * fABFF * 0 + fABFF * fBBFF * 0 + fBBFF * fAAEE * 0 +
  fBBFF * fABEE * 0 + fBBFF * fBBEE * 0 + fBBFF * fAAEF * 0 + fBBFF * fABEF * 0 +
  fBBFF * fBBEF * 0 + fBBFF * fAAFF * 0 + fBBFF * fABFF * 0 + fBBFF * fBBFF * 0 + 0]
fABEEdrive = FullSimplify[fAAEE * fAAEE * 0 + fAAEE * fABEE * 1 / 2 + fAAEE * fBBEE * 1 +
  fAAEE * fAAEF * 0 + fAAEE * fABEF * 1 / 4 + fAAEE * fBBEF * 1 / 2 + fAAEE * fAAFF * 0 +
  fAAEE * fABFF * 0 + fAAEE * fBBFF * 0 + fABEE * fAAEE * d0 + fABEE * fABEE * 1 / 2 +
  fABEE * fBBEE * (1 - d0) + fABEE * fAAEF * d0 / 2 + fABEE * fABEF * 1 / 4 +
  fABEE * fBBEF * (1 - d0) / 2 + fABEE * fAAFF * 0 + fABEE * fABFF * 0 + fABEE * fBBFF * 0 +
  fBBEE * fAAEE * 1 + fBBEE * fABEE * 1 / 2 + fBBEE * fBBEE * 0 + fBBEE * fAAEF * 1 / 2 +
  fBBEE * fABEF * 1 / 4 + fBBEE * fBBEF * 0 + fBBEE * fAAFF * 0 + fBBEE * fABFF * 0 +
  fBBEE * fBBFF * 0 + fAAEF * fAAEE * 0 + fAAEF * fABEE * 1 / 4 + fAAEF * fBBEE * 1 / 2 +

```

```

fAAEF * fAAEF * 0 + fAAEF * fABEF * 1 / 8 + fAAEF * fBBEF * 1 / 4 + fAAEF * fAAFF * 0 +
fAAEF * fABFF * 0 + fAAEF * fBBFF * 0 + fABEF * fAAEE * d0 / 2 + fABEF * fABEE * 1 / 4 +
fABEF * fBBEE * (1 - d0) / 2 + fABEF * fAAEF * d0 / 4 + fABEF * fABEF * 1 / 8 +
fABEF * fBBEF * (1 - d0) / 4 + fABEF * fAAFF * 0 + fABEF * fABFF * 0 + fABEF * fBBFF * 0 +
fBBEF * fAAEE * 1 / 2 + fBBEF * fABEE * 1 / 4 + fBBEF * fBBEE * 0 + fBBEF * fAAEF * 1 / 4 +
fBBEF * fABEF * 1 / 8 + fBBEF * fBBEF * 0 + fBBEF * fAAFF * 0 + fBBEF * fABFF * 0 +
fBBEF * fBBFF * 0 + fAAFF * fAAEE * 0 + fAAFF * fABEE * 0 + fAAFF * fBBEE * 0 +
fAAFF * fAAEF * 0 + fAAFF * fABEF * 0 + fAAFF * fBBEF * 0 + fAAFF * fAAFF * 0 +
fAAFF * fABFF * 0 + fAAFF * fBBFF * 0 + fABFF * fAAEE * 0 + fABFF * fABEE * 0 +
fABFF * fBBEE * 0 + fABFF * fAAEF * 0 + fABFF * fABEF * 0 + fABFF * fBBEF * 0 +
fABFF * fAAFF * 0 + fABFF * fABFF * 0 + fABFF * fBBFF * 0 + fBBFF * fAAEE * 0 +
fBBFF * fABEE * 0 + fBBFF * fBBEE * 0 + fBBFF * fAAEF * 0 + fBBFF * fABEF * 0 +
fBBFF * fBBEF * 0 + fBBFF * fAAFF * 0 + fBBFF * fABFF * 0 + fBBFF * fBBFF * 0 + 0]
fBBEEDrive = FullSimplify[fAAEE * fAAEE * 0 + fAAEE * fABEE * 0 + fAAEE * fBBEE * 0 +
fAAEE * fAAEF * 0 + fAAEE * fABEF * 0 + fAAEE * fBBEF * 0 + fAAEE * fAAFF * 0 +
fAAEE * fABFF * 0 + fAAEE * fBBFF * 0 + fABEE * fAAEE * 0 + fABEE * fABEE * d0 / 2 +
fABEE * fBBEE * d0 + fABEE * fAAEF * 0 + fABEE * fABEF * (d0 / 4) +
fABEE * fBBEF * d0 / 2 + fABEE * fAAFF * 0 + fABEE * fABFF * 0 + fABEE * fBBFF * 0 +
fBBEE * fAAEE * 0 + fBBEE * fABEE * 1 / 2 + fBBEE * fBBEE * 1 + fBBEE * fAAEF * 0 +
fBBEE * fABEF * 1 / 4 + fBBEE * fBBEF * 1 / 2 + fBBEE * fAAFF * 0 + fBBEE * fABFF * 0 +
fBBEE * fBBFF * 0 + fAAEF * fAAEE * 0 + fAAEF * fABEE * 0 + fAAEF * fBBEE * 0 +
fAAEF * fAAEF * 0 + fAAEF * fABEF * 0 + fAAEF * fBBEF * 0 + fAAEF * fAAFF * 0 +
fAAEF * fABFF * 0 + fAAEF * fBBFF * 0 + fABEF * fAAEE * 0 + fABEF * fABEE * (d0 / 4) +
fABEF * fBBEE * d0 / 2 + fABEF * fAAEF * 0 + fABEF * fABEF * (d0 / 8) +
fABEF * fBBEF * d0 / 4 + fABEF * fAAFF * 0 + fABEF * fABFF * 0 + fABEF * fBBFF * 0 +
fBBEF * fAAEE * 0 + fBBEF * fABEE * 1 / 4 + fBBEF * fBBEE * 1 / 2 + fBBEF * fAAEF * 0 +
fBBEF * fABEF * 1 / 8 + fBBEF * fBBEF * 1 / 4 + fBBEF * fAAFF * 0 + fBBEF * fABFF * 0 +
fBBEF * fBBFF * 0 + fAAFF * fAAEE * 0 + fAAFF * fABEE * 0 + fAAFF * fBBEE * 0 +
fAAFF * fAAEF * 0 + fAAFF * fABEF * 0 + fAAFF * fBBEF * 0 + fAAFF * fAAFF * 0 +
fAAFF * fABFF * 0 + fAAFF * fBBFF * 0 + fABFF * fAAEE * 0 + fABFF * fABEE * 0 +
fABFF * fBBEE * 0 + fABFF * fAAEF * 0 + fABFF * fABEF * 0 + fABFF * fBBEF * 0 +
fABFF * fAAFF * 0 + fABFF * fABFF * 0 + fABFF * fBBFF * 0 + fBBFF * fAAEE * 0 +
fBBFF * fABEE * 0 + fBBFF * fBBEE * 0 + fBBFF * fAAEF * 0 + fBBFF * fABEF * 0 +
fBBFF * fBBEF * 0 + fBBFF * fAAFF * 0 + fBBFF * fABFF * 0 + fBBFF * fBBFF * 0 + 0]
fAAEFDrive = FullSimplify[fAAEE * fAAEE * 0 + fAAEE * fABEE * 0 + fAAEE * fBBEE * 0 +
fAAEE * fAAEF * 1 / 2 + fAAEE * fABEF * 1 / 4 + fAAEE * fBBEF * 0 + fAAEE * fAAFF * 1 +
fAAEE * fABFF * 1 / 2 + fAAEE * fBBFF * 0 + fABEE * fAAEE * 0 + fABEE * fABEE * 0 +
fABEE * fBBEE * 0 + fABEE * fAAEF * (1 - d1) / 2 + fABEE * fABEF * (1 - d1) / 4 +
fABEE * fBBEF * 0 + fABEE * fAAFF * (1 - d1) + fABEE * fABFF * (1 - d1) / 2 +
fABEE * fBBFF * 0 + fBBEE * fAAEE * 0 + fBBEE * fABEE * 0 + fBBEE * fBBEE * 0 +
fBBEE * fAAEF * 0 + fBBEE * fABEF * 0 + fBBEE * fBBEF * 0 + fBBEE * fAAFF * 0 +
fBBEE * fABFF * 0 + fBBEE * fBBFF * 0 + fAAEF * fAAEE * 1 / 2 + fAAEF * fABEE * 1 / 4 +
fAAEF * fBBEE * 0 + fAAEF * fAAEF * 1 / 2 + fAAEF * fABEF * 1 / 4 + fAAEF * fBBEF * 0 +
fAAEF * fAAFF * 1 / 2 + fAAEF * fABFF * 1 / 4 + fAAEF * fBBFF * 0 + fABEF * fAAEE * (1 - d0) / 2 +
fABEF * fABEE * (1 - d0) / 4 + fABEF * fBBEE * 0 + fABEF * fAAEF * ((1 - d0) / 4 + (1 - d1) / 4) +
fABEF * fABEF * ((1 - d0) / 8 + (1 - d1) / 8) + fABEF * fBBEF * 0 + fABEF * fAAFF * (1 - d1) / 2 +
fABEF * fABFF * (1 - d1) / 4 + fABEF * fBBFF * 0 + fBBEF * fAAEE * 0 + fBBEF * fABEE * 0 +
fBBEF * fBBEE * 0 + fBBEF * fAAEF * 0 + fBBEF * fABEF * 0 + fBBEF * fBBEF * 0 +
fBBEF * fAAFF * 0 + fBBEF * fABFF * 0 + fBBEF * fBBFF * 0 + fAAFF * fAAEE * 1 +
fAAFF * fABEE * 1 / 2 + fAAFF * fBBEE * 0 + fAAFF * fAAEF * 1 / 2 + fAAFF * fABEF * 1 / 4 +
fAAFF * fBBEF * 0 + fAAFF * fAAFF * 0 + fAAFF * fABFF * 0 + fAAFF * fBBFF * 0 +
fABFF * fAAEE * d0 + fABFF * fABEE * (1 - d0) / 2 + fABFF * fBBEE * 0 +
fABFF * fAAEF * (1 - d0) / 2 + fABFF * fABEF * (1 - d0) / 4 + fABFF * fBBEF * 0 +
fABFF * fAAFF * 0 + fABFF * fABFF * 0 + fABFF * fBBFF * 0 + fBBFF * fAAEE * 0 +
fBBFF * fABEE * 0 + fBBFF * fBBEE * 0 + fBBFF * fAAEF * 0 + fBBFF * fABEF * 0 +

```

```

fBBFF * fBBEF * 0 + fBBFF * fAAFF * 0 + fBBFF * fABFF * 0 + fBBFF * fBBFF * 0 + 0]
fABEF_Drive = FullSimplify[ fAAEE * fAAEE * 0 + fAAEE * fABEE * 0 + fAAEE * fBBEE * 0 +
fAAEE * fAAEF * 0 + fAAEE * fABEF * 1 / 4 + fAAEE * fBBEF * 1 / 2 + fAAEE * fAAFF * 0 +
fAAEE * fABFF * 1 / 2 + fAAEE * fBBFF * 1 + fABEE * fAAEE * 0 + fABEE * fABEE * 0 +
fABEE * fBBEE * 0 + fABEE * fAAEF * d1 / 2 + fABEE * fABEF * 1 / 4 +
fABEE * fBBEF * (1 - d1) / 2 + fABEE * fAAFF * d1 + fABEE * fABFF * 1 / 2 +
fABEE * fBBFF * (1 - d1) + fBBEE * fAAEE * 0 + fBBEE * fABEE * 0 + fBBEE * fBBEE * 0 +
fBBEE * fAAEF * 1 / 2 + fBBEE * fABEF * 1 / 4 + fBBEE * fBBEF * 0 + fBBEE * fAAFF * 1 +
fBBEE * fABFF * 1 / 2 + fBBEE * fBBFF * 0 + fAAEF * fAAEE * 0 + fAAEF * fABEE * 1 / 4 +
fAAEF * fBBEE * 1 / 2 + fAAEF * fAAEF * 0 + fAAEF * fABEF * 1 / 4 + fAAEF * fBBEF * 1 / 2 +
fAAEF * fAAFF * 0 + fAAEF * fABFF * 1 / 4 + fAAEF * fBBFF * 1 / 2 + fABEF * fAAEE * d0 / 2 +
fABEF * fABEE * 1 / 4 + fABEF * fBBEE * (1 - d0) / 2 + fABEF * fAAEF * (d0 / 4 + d1 / 4) +
fABEF * fABEF * 1 / 4 + fABEF * fBBEF * ((1 - d0) / 4 + (1 - d1) / 4) + fABEF * fAAFF * d1 / 2 +
fABEF * fABFF * 1 / 4 + fABEF * fBBFF * (1 - d1) / 2 + fBBEF * fAAEE * 1 / 2 +
fBBEF * fABEE * 1 / 4 + fBBEF * fBBEE * 0 + fBBEF * fAAEF * 1 / 2 + fBBEF * fABEF * 1 / 4 +
fBBEF * fBBEF * 0 + fBBEF * fAAFF * 1 / 2 + fBBEF * fABFF * 1 / 4 + fBBEF * fBBFF * 0 +
fAAFF * fAAEE * 0 + fAAFF * fABEE * 1 / 2 + fAAFF * fBBEE * 1 + fAAFF * fAAEF * 0 +
fAAFF * fABEF * 1 / 4 + fAAFF * fBBEF * 1 / 2 + fAAFF * fAAFF * 0 + fAAFF * fABFF * 0 +
fAAFF * fBBFF * 0 + fABFF * fAAEE * (1 - d0) + fABFF * fABEE * 1 / 2 + fABFF * fBBEE * d0 +
fABFF * fAAEF * d0 / 2 + fABFF * fABEF * 1 / 4 + fABFF * fBBEF * (1 - d0) / 2 +
fABFF * fAAFF * 0 + fABFF * fABFF * 0 + fABFF * fBBFF * 0 + fBBFF * fAAEE * 1 +
fBBFF * fABEE * 1 / 2 + fBBFF * fBBEE * 0 + fBBFF * fAAEF * 1 / 2 + fBBFF * fABEF * 1 / 4 +
fBBFF * fBBEF * 0 + fBBFF * fAAFF * 0 + fBBFF * fABFF * 0 + fBBFF * fBBFF * 0 + 0]
fBBEF_Drive = FullSimplify[ fAAEE * fAAEE * 0 + fAAEE * fABEE * 0 + fAAEE * fBBEE * 0 +
fAAEE * fAAEF * 0 + fAAEE * fABEF * 0 + fAAEE * fBBEF * 0 + fAAEE * fAAFF * 0 +
fAAEE * fABFF * 0 + fAAEE * fBBFF * 0 + fABEE * fAAEE * 0 + fABEE * fABEE * 0 +
fABEE * fBBEE * 0 + fABEE * fAAEF * 0 + fABEE * fABEF * d1 / 4 + fABEE * fBBEF * d1 / 2 +
fABEE * fAAFF * 0 + fABEE * fABFF * d1 / 2 + fABEE * fBBFF * d1 + fBBEE * fAAEE * 0 +
fBBEE * fABEE * 0 + fBBEE * fBBEE * 0 + fBBEE * fAAEF * 0 + fBBEE * fABEF * 1 / 4 +
fBBEE * fBBEF * 1 / 2 + fBBEE * fAAFF * 0 + fBBEE * fABFF * 1 / 2 + fBBEE * fBBFF * 1 +
fAAEF * fAAEE * 0 + fAAEF * fABEE * 0 + fAAEF * fBBEE * 0 + fAAEF * fAAEF * 0 +
fAAEF * fABEF * 0 + fAAEF * fBBEF * 0 + fAAEF * fAAFF * 0 + fAAEF * fABFF * 0 +
fAAEF * fBBFF * 0 + fABEF * fAAEE * 0 + fABEF * fABEE * (d0 / 4) + fABEF * fBBEE * (d0 / 2) +
fABEF * fAAEF * 0 + fABEF * fABEF * (d0 / 8 + d1 / 8) + fABEF * fBBEF * (d0 / 4 + d1 / 4) +
fABEF * fAAFF * 0 + fABEF * fABFF * d1 / 4 + fABEF * fBBFF * (d1 / 2) +
fBBEF * fAAEE * 0 + fBBEF * fABEE * 1 / 4 + fBBEF * fBBEE * 1 / 2 + fBBEF * fAAEF * 0 +
fBBEF * fABEF * 1 / 4 + fBBEF * fBBEF * 1 / 2 + fBBEF * fAAFF * 0 + fBBEF * fABFF * 1 / 4 +
fBBEF * fBBFF * 1 / 2 + fAAFF * fAAEE * 0 + fAAFF * fABEE * 0 + fAAFF * fBBEE * 0 +
fAAFF * fAAEF * 0 + fAAFF * fABEF * 0 + fAAFF * fBBEF * 0 + fAAFF * fAAFF * 0 +
fAAFF * fABFF * 0 + fAAFF * fBBFF * 0 + fABFF * fAAEE * 0 + fABFF * fABEE * d0 / 2 +
fABFF * fBBEE * (1 - d0) + fABFF * fAAEF * 0 + fABFF * fABEF * d0 / 4 + fABFF * fBBEF * d0 / 2 +
fABFF * fAAFF * 0 + fABFF * fABFF * 0 + fABFF * fBBFF * 0 + fBBFF * fAAEE * 0 +
fBBFF * fABEE * 1 / 2 + fBBFF * fBBEE * 1 + fBBFF * fAAEF * 0 + fBBFF * fABEF * 1 / 4 +
fBBFF * fBBEF * 1 / 2 + fBBFF * fAAFF * 0 + fBBFF * fABFF * 0 + fBBFF * fBBFF * 0 + 0]
fAAFF_Drive = FullSimplify[ fAAEE * fAAEE * 0 + fAAEE * fABEE * 0 + fAAEE * fBBEE * 0 +
fAAEE * fAAEF * 0 + fAAEE * fABEF * 0 + fAAEE * fBBEF * 0 + fAAEE * fAAFF * 0 +
fAAEE * fABFF * 0 + fAAEE * fBBFF * 0 + fABEE * fAAEE * 0 + fABEE * fABEE * 0 +
fABEE * fBBEE * 0 + fABEE * fAAEF * 0 + fABEE * fABEF * 0 + fABEE * fBBEF * 0 +
fABEE * fAAFF * 0 + fABEE * fABFF * 0 + fABEE * fBBFF * 0 + fBBEE * fAAEE * 0 +
fBBEE * fABEE * 0 + fBBEE * fBBEE * 0 + fBBEE * fAAEF * 0 + fBBEE * fABEF * 0 +
fBBEE * fBBEF * 0 + fBBEE * fAAFF * 0 + fBBEE * fABFF * 0 + fBBEE * fBBFF * 0 +
fAAEF * fAAEE * 0 + fAAEF * fABEE * 0 + fAAEF * fBBEE * 0 + fAAEF * fAAEF * 1 / 4 +
fAAEF * fABEF * 1 / 8 + fAAEF * fBBEF * 0 + fAAEF * fAAFF * 1 / 2 +
fAAEF * fABFF * 1 / 4 + fAAEF * fBBFF * 0 + fABEF * fAAEE * 0 + fABEF * fABEE * 0 +
fABEF * fBBEE * 0 + fABEF * fAAEF * (1 - d1) / 4 + fABEF * fABEF * (1 - d1) / 8 +

```

```

fABEF * fBBEF * 0 + fABEF * fAAFF * (1 - d1) / 2 + fABEF * fABFF * (1 - d1) / 4 +
fABEF * fBBFF * 0 + fBBEF * fAAEE * 0 + fBBEF * fABEE * 0 + fBBEF * fBBEE * 0 +
fBBEF * fAAEF * 0 + fBBEF * fABEF * 0 + fBBEF * fBBEF * 0 + fBBEF * fAAFF * 0 +
fBBEF * fABFF * 0 + fBBEF * fBBFF * 0 + fAAFF * fAAEE * 0 + fAAFF * fABEE * 0 +
fAAFF * fBBEE * 0 + fAAFF * fAAEF * 1 / 2 + fAAFF * fABEF * 1 / 4 + fAAFF * fBBEF * 0 +
fAAFF * fAAFF * 1 + fAAFF * fABFF * 1 / 2 + fAAFF * fBBFF * 0 + fABFF * fAAEE * 0 +
fABFF * fABEE * 0 + fABFF * fBBEE * 0 + fABFF * fAAEF * (1 - d1) / 2 +
fABFF * fABEF * (1 - d1) / 4 + fABFF * fBBEF * 0 + fABFF * fAAFF * (1 - d1) +
fABFF * fABFF * (1 - d1) / 2 + fABFF * fBBFF * 0 + fBBFF * fAAEE * 0 +
fBBFF * fABEE * 0 + fBBFF * fBBEE * 0 + fBBFF * fAAEF * 0 + fBBFF * fABEF * 0 +
fBBFF * fBBEF * 0 + fBBFF * fAAFF * 0 + fBBFF * fABFF * 0 + fBBFF * fBBFF * 0 + 0]
fABFF_Drive = FullSimplify[fAAEE * fAAEE * 0 + fAAEE * fABEE * 0 + fAAEE * fBBEE * 0 +
fAAEE * fAAEF * 0 + fAAEE * fABEF * 0 + fAAEE * fBBEF * 0 + fAAEE * fAAFF * 0 +
fAAEE * fABFF * 0 + fAAEE * fBBFF * 0 + fABEE * fAAEE * 0 + fABEE * fABEE * 0 +
fABEE * fBBEE * 0 + fABEE * fAAEF * 0 + fABEE * fABEF * 0 + fABEE * fBBEF * 0 +
fABEE * fAAFF * 0 + fABEE * fABFF * 0 + fABEE * fBBFF * 0 + fBBEE * fAAEE * 0 +
fBBEE * fABEE * 0 + fBBEE * fBBEE * 0 + fBBEE * fAAEF * 0 + fBBEE * fABEF * 0 +
fBBEE * fBBEF * 0 + fBBEE * fAAFF * 0 + fBBEE * fABFF * 0 + fBBEE * fBBFF * 0 +
fAAEF * fAAEE * 0 + fAAEF * fABEE * 0 + fAAEF * fBBEE * 0 + fAAEF * fAAEF * 0 +
fAAEF * fABEF * 1 / 8 + fAAEF * fBBEF * 1 / 4 + fAAEF * fAAFF * 0 + fAAEF * fABFF * 1 / 4 +
fAAEF * fBBFF * 1 / 2 + fABEF * fAAEE * 0 + fABEF * fABEE * 0 + fABEF * fBBEE * 0 +
fABEF * fAAEF * d1 / 4 + fABEF * fABEF * 1 / 8 + fABEF * fBBEF * (1 - d1) / 4 +
fABEF * fAAFF * d1 / 2 + fABEF * fABFF * 1 / 4 + fABEF * fBBFF * (1 - d1) / 2 +
fBBEF * fAAEE * 0 + fBBEF * fABEE * 0 + fBBEF * fBBEE * 0 + fBBEF * fAAEF * 1 / 4 +
fBBEF * fABEF * 1 / 8 + fBBEF * fBBEF * 0 + fBBEF * fAAFF * 1 / 2 + fBBEF * fABFF * 1 / 4 +
fBBEF * fBBFF * 0 + fAAFF * fAAEE * 0 + fAAFF * fABEE * 0 + fAAFF * fBBEE * 0 +
fAAFF * fAAEF * 0 + fAAFF * fABEF * 1 / 4 + fAAFF * fBBEF * 1 / 2 + fAAFF * fAAFF * 0 +
fAAFF * fABFF * 1 / 2 + fAAFF * fBBFF * 1 + fABFF * fAAEE * 0 + fABFF * fABEE * 0 +
fABFF * fBBEE * 0 + fABFF * fAAEF * d1 / 2 + fABFF * fABEF * 1 / 4 + fABFF * fBBEF * (1 - d1) / 2 +
fABFF * fAAFF * d1 + fABFF * fABFF * 1 / 2 + fABFF * fBBFF * (1 - d1) + fBBFF * fAAEE * 0 +
fBBFF * fABEE * 0 + fBBFF * fBBEE * 0 + fBBFF * fAAEF * 1 / 2 + fBBFF * fABEF * 1 / 4 +
fBBFF * fBBEF * 0 + fBBFF * fAAFF * 1 + fBBFF * fABFF * 1 / 2 + fBBFF * fBBFF * 0 + 0]
fBBFF_Drive = FullSimplify[fAAEE * fAAEE * 0 + fAAEE * fABEE * 0 + fAAEE * fBBEE * 0 +
fAAEE * fAAEF * 0 + fAAEE * fABEF * 0 + fAAEE * fBBEF * 0 + fAAEE * fAAFF * 0 +
fAAEE * fABFF * 0 + fAAEE * fBBFF * 0 + fABEE * fAAEE * 0 + fABEE * fABEE * 0 +
fABEE * fBBEE * 0 + fABEE * fAAEF * 0 + fABEE * fABEF * 0 + fABEE * fBBEF * 0 +
fABEE * fAAFF * 0 + fABEE * fABFF * 0 + fABEE * fBBFF * 0 + fBBEE * fAAEE * 0 +
fBBEE * fABEE * 0 + fBBEE * fBBEE * 0 + fBBEE * fAAEF * 0 + fBBEE * fABEF * 0 +
fBBEE * fBBEF * 0 + fBBEE * fAAFF * 0 + fBBEE * fABFF * 0 + fBBEE * fBBFF * 0 +
fAAEF * fAAEE * 0 + fAAEF * fABEE * 0 + fAAEF * fBBEE * 0 + fAAEF * fAAEF * 0 +
fAAEF * fABEF * 0 + fAAEF * fBBEF * 0 + fAAEF * fAAFF * 0 + fAAEF * fABFF * 0 +
fAAEF * fBBFF * 0 + fABEF * fAAEE * 0 + fABEF * fABEE * 0 + fABEF * fBBEE * 0 +
fABEF * fAAEF * 0 + fABEF * fABEF * d1 / 8 + fABEF * fBBEF * d1 / 4 +
fABEF * fAAFF * 0 + fABEF * fABFF * d1 / 4 + fABEF * fBBFF * d1 / 2 +
fBBEF * fAAEE * 0 + fBBEF * fABEE * 0 + fBBEF * fBBEE * 0 + fBBEF * fAAEF * 0 +
fBBEF * fABEF * 1 / 8 + fBBEF * fBBEF * 1 / 4 + fBBEF * fAAFF * 0 + fBBEF * fABFF * 1 / 4 +
fBBEF * fBBFF * 1 / 2 + fAAFF * fAAEE * 0 + fAAFF * fABEE * 0 + fAAFF * fBBEE * 0 +
fAAFF * fAAEF * 0 + fAAFF * fABEF * 0 + fAAFF * fBBEF * 0 + fAAFF * fAAFF * 0 +
fAAFF * fABFF * 0 + fAAFF * fBBFF * 0 + fABFF * fAAEE * 0 + fABFF * fABEE * 0 +
fABFF * fBBEE * 0 + fABFF * fAAEF * 0 + fABFF * fABEF * d1 / 4 + fABFF * fBBEF * d1 / 2 +
fABFF * fAAFF * 0 + fABFF * fABFF * d1 / 2 + fABFF * fBBFF * (d1) + fBBFF * fAAEE * 0 +
fBBFF * fABEE * 0 + fBBFF * fBBEE * 0 + fBBFF * fAAEF * 0 + fBBFF * fABEF * 1 / 4 +
fBBFF * fBBEF * 1 / 2 + fBBFF * fAAFF * 0 + fBBFF * fABFF * 1 / 2 + fBBFF * fBBFF * 1 + 0]

```

$$\frac{1}{8} (4 \text{fAAEE} + 2 (\text{fAAEF} + \text{fABEE}) + \text{fABEF}) (2 \text{fAAEE} + \text{fAAEF} - (-1 + \text{d0}) (2 \text{fABEE} + \text{fABEF}))$$

$$\frac{1}{8} (\text{fAAEF} (2 \text{fABEE} + 4 \text{d0} \text{fABEE} + \text{fABEF} + 2 \text{d0} \text{fABEF} + 8 \text{fBBEE} + 4 \text{fBBEF}) + 2 \text{fAAEE} ((2 + 4 \text{d0}) \text{fABEE} + \text{fABEF} + 2 \text{d0} \text{fABEF} + 8 \text{fBBEE} + 4 \text{fBBEF}) + (2 \text{fABEE} + \text{fABEF}) (2 \text{fABEE} + \text{fABEF} - (-3 + 2 \text{d0}) (2 \text{fBBEE} + \text{fBBEF})))$$

$$\frac{1}{8} (\text{d0} (2 \text{fABEE} + \text{fABEF}) + 2 \text{fBBEE} + \text{fBBEF}) (2 \text{fABEE} + \text{fABEF} + 4 \text{fBBEE} + 2 \text{fBBEF})$$

$$\frac{1}{8} (4 \text{fAAEF}^2 + 2 \text{fAAEE} (4 \text{fAAEF} + 8 \text{fAAFF} + 3 \text{fABEF} - 2 \text{d0} \text{fABEF} + 2 \text{fABFF} + 4 \text{d0} \text{fABFF}) - (2 \text{fABEE} + \text{fABEF}) ((-6 + 4 \text{d1}) \text{fAAFF} + (-2 + \text{d0} + \text{d1}) (\text{fABEF} + 2 \text{fABFF})) + \text{fAAEF} (8 \text{fAAFF} - 2 ((-3 + 2 \text{d1}) \text{fABEE} + (-3 + \text{d0} + \text{d1}) \text{fABEF} + (-3 + 2 \text{d0}) \text{fABFF})))$$

$$\frac{1}{4} (2 \text{fABEE} \text{fABEF} + \text{fABEF}^2 + 4 \text{fABEE} \text{fABFF} + 2 \text{fABEF} \text{fABFF} + 3 \text{fABEF} \text{fBBEE} - 2 \text{d0} \text{fABEF} \text{fBBEE} + 2 \text{fABFF} \text{fBBEE} + 4 \text{d0} \text{fABFF} \text{fBBEE} + 3 \text{fABEE} \text{fBBEF} - 2 \text{d1} \text{fABEE} \text{fBBEF} + 3 \text{fABEF} \text{fBBEF} - \text{d0} \text{fABEF} \text{fBBEF} - \text{d1} \text{fABEF} \text{fBBEF} + 3 \text{fABFF} \text{fBBEF} - 2 \text{d0} \text{fABFF} \text{fBBEF} + \text{fAAFF} ((2 + 4 \text{d1}) \text{fABEE} + \text{fABEF} + 2 \text{d1} \text{fABEF} + 8 \text{fBBEE} + 4 \text{fBBEF}) - (-3 + 2 \text{d1}) (2 \text{fABEE} + \text{fABEF}) \text{fBBFF} + \text{fAAEE} (\text{fABEF} + 2 \text{d0} \text{fABEF} + 6 \text{fABFF} - 4 \text{d0} \text{fABFF} + 4 \text{fBBEF} + 8 \text{fBBFF}) + \text{fAAEF} (\text{fABEE} + 2 \text{d1} \text{fABEE} + (1 + \text{d0} + \text{d1}) \text{fABEF} + \text{fABFF} + 2 \text{d0} \text{fABFF} + 4 (\text{fBBEE} + \text{fBBEF} + \text{fBBFF})))$$

$$\frac{1}{8} (\text{d0} (\text{fABEF}^2 + 2 \text{fABEE} (\text{fABEF} + 2 \text{fABFF}) + 4 \text{fABFF} (-2 \text{fBBEE} + \text{fBBEF}) + 2 \text{fABEF} (\text{fABFF} + 2 \text{fBBEE} + \text{fBBEF})) + 2 (\text{fABFF} (6 \text{fBBEE} + \text{fBBEF}) + \text{fABEF} (\text{fBBEE} + \text{fBBEF} + \text{fBBFF}) + (\text{fABEE} + 4 \text{fBBEE} + 2 \text{fBBEF}) (\text{fBBEF} + 2 \text{fBBFF})) + \text{d1} (2 \text{fABEE} + \text{fABEF}) (\text{fABEF} + 2 (\text{fABFF} + \text{fBBEF} + 2 \text{fBBFF})))$$

$$\frac{1}{8} (2 \text{fAAEF} + 4 \text{fAAFF} + \text{fABEF} + 2 \text{fABFF}) (\text{fAAEF} + 2 \text{fAAFF} - (-1 + \text{d1}) (\text{fABEF} + 2 \text{fABFF}))$$

$$\frac{1}{8} (\text{fAAEF} (\text{fABEF} + 2 \text{d1} \text{fABEF} + 2 \text{fABFF} + 4 \text{d1} \text{fABFF} + 4 \text{fBBEF} + 8 \text{fBBFF}) + 2 \text{fAAFF} (\text{fABEF} + 2 \text{d1} \text{fABEF} + 2 \text{fABFF} + 4 \text{d1} \text{fABFF} + 4 \text{fBBEF} + 8 \text{fBBFF}) + (\text{fABEF} + 2 \text{fABFF}) (\text{fABEF} + 2 \text{fABFF} - (-3 + 2 \text{d1}) (\text{fBBEF} + 2 \text{fBBFF})))$$

$$\frac{1}{8} (\text{d1} (\text{fABEF} + 2 \text{fABFF}) + \text{fBBEF} + 2 \text{fBBFF}) (\text{fABEF} + 2 (\text{fABFF} + \text{fBBEF} + 2 \text{fBBFF}))$$

## Selection

**wAAEE = wAAEF = wAAFF = 1;**  
**wABEE = wABEF = wABFF = 1 - hs;**  
**wBBEE = wBBEF = wBBFF = 1 - s;**

$\bar{W} = \text{FullSimplify}[(\text{fAAEE}_{\text{Drive}} \text{wAAEE} + \text{fAAEF}_{\text{Drive}} \text{wAAEF} + \text{fAAFF}_{\text{Drive}} \text{wAAFF}$   
 $+ \text{fABEE}_{\text{Drive}} \text{wABEE} + \text{fABEF}_{\text{Drive}} \text{wABEF} + \text{fABFF}_{\text{Drive}} \text{wABFF}$   
 $+ \text{fBBEE}_{\text{Drive}} \text{wBBEE} + \text{fBBEF}_{\text{Drive}} \text{wBBEF} + \text{fBBFF}_{\text{Drive}} \text{wBBFF}$   
 $)];$

```

fAAEE_Sel = FullSimplify[fAAEE_Drive wAAEE / W];
fABEE_Sel = FullSimplify[fABEE_Drive wABEE / W];
fBBEE_Sel = FullSimplify[fBBEE_Drive wBBEE / W];
fAAEF_Sel = FullSimplify[fAAEF_Drive wAAEF / W];
fABEF_Sel = FullSimplify[fABEF_Drive wABEF / W];
fBBEF_Sel = FullSimplify[fBBEF_Drive wBBEF / W];
fAAFF_Sel = FullSimplify[fAAFF_Drive wAAFF / W];
fABFF_Sel = FullSimplify[fABFF_Drive wABFF / W];
fBBFF_Sel = FullSimplify[fBBFF_Drive wBBFF / W];
fA_Sel = FullSimplify[fAAEE_Sel + fAAEF_Sel + fAAFF_Sel + (fABEE_Sel + fABEF_Sel + fABFF_Sel) / 2];
fB_Sel = FullSimplify[fBBEE_Sel + fBBEF_Sel + fBBFF_Sel + (fABEE_Sel + fABEF_Sel + fABFF_Sel) / 2];
fE_Sel = FullSimplify[fAAEE_Sel + fABEE_Sel + fBBEE_Sel + (fAAEF_Sel + fABEF_Sel + fBBEF_Sel) / 2];
fF_Sel = FullSimplify[fAAFF_Sel + fABFF_Sel + fBBFF_Sel + (fAAEF_Sel + fABEF_Sel + fBBEF_Sel) / 2];
ΔfA = FullSimplify[fA_Sel - fA];
ΔfB = FullSimplify[fB_Sel - fB];
ΔfE = FullSimplify[fE_Sel - fE];
ΔfF = FullSimplify[fF_Sel - fF];

(*ΔfC=FullSimplify[fC_Sel-fC];*)

(*Check: do genotype freqs after selection sum to one?*)
FullSimplify[fA_Sel + fB_Sel]
FullSimplify[fE_Sel + fF_Sel]
1
1

```

---

## Analysis

### Invasion of sperm-acting drive modifier unlinked to the driver

```

invasionOfUnlinkedModeifier =
  FullSimplify[W ΔfF / fF /. randomHaps /. D → 0 /. sum2one /. minormod] /.
  fF → 0 (*this assumes no LD and random mating*)
- (-1 + fB) fB ((-1 + 2 fB) hs - fB s) ε

(*With some rearrangement,
  invasionOfUnlinkedModeifier = -ε fA fB (fB s + (fA - fB) hs)
  So long as sh ≤ s, [
  i.e. the driver does not have an underdominant effect on fitness] this is
  guaranteed to be positive when ε is negative [i.e. the modifier dampens drive]*)

```



## Fixation of sperm-acting drive modifier unlinked to the driver

```
fixationOfUnlinkedModifier = FullSimplify[
  FullSimplify[ $\bar{W} \Delta fF / (1 - fF) /. \text{randomHaps} /. D \rightarrow 0 /. \text{sum2one} /. \text{minormod} ] /. fF \rightarrow 1 ]
  (*this assumes no LD and random mating*)
  (-1 + fB) fB (hs - 2 fB hs + fB s) \epsilon
  (*Thus the invasion and fixation conditions are equivalent*)$ 
```

## Model 6'. Female drive depends on female genotype at an unlinked locus

In addition to our one locus with two alleles, A (non-driving) and B (traditional driver), we have a second locus with loci, E and F. We are concerned with the invasion and fixation of the F allele, which acts to modify drive when it fertilizes a heterozygote. Drive of the B allele is  $d_0$ , but changes to  $d_1$  when fertilized by an 'F' bearing sperm

### Setup

```
ClearAll["Global`*"]

fA = .; fB = .; fE = .; fF = .;
fAE = fA fE + D;
fAF = fA fF - D;
fBE = fB fE - D;
fBF = fB fF + D;
randomHaps = {fAAEE \rightarrow FullSimplify[fAE fAE],
  fABEE \rightarrow FullSimplify[2 fAE fBE], fBBEE \rightarrow FullSimplify[fBE fBE],
  fAAEF \rightarrow FullSimplify[2 fAE fAF], fABEF \rightarrow FullSimplify[2 (fAE fBF + fAF fBE)],
  fBBEF \rightarrow FullSimplify[2 fBE fBF], fAAFF \rightarrow FullSimplify[fAF fAF],
  fABFF \rightarrow FullSimplify[2 fAF fBF], fBBFF \rightarrow FullSimplify[fBF fBF]};
sum2one = {fA \rightarrow 1 - fB, fE \rightarrow 1 - fF}
minormod = {d1 \rightarrow d0 + \epsilon}
(*assuming the sperm acting modifier additively increases drive by epsilon*);
{fA \rightarrow 1 - fB, fE \rightarrow 1 - fF}
```

### Drive

```
fAAEEdrive = FullSimplify[
  (fAAEE * fAAEE * 1) + (fAAEE * fABEE * 1 / 2) + (fAAEE * fBBEE * 0) + (fAAEE * fAAEF * 1 / 2) +
  (fAAEE * fABEF * 1 / 4) + (fAAEE * fBBEF * 0) + (fAAEE * fAAFF * 0) + (fAAEE * fABFF * 0) +
  (fAAEE * fBBFF * 0) + (fABEE * fAAEE * (1 - d0)) + (fABEE * fABEE * ((1 - d0) / 2)) +
  (fABEE * fBBEE * 0) + (fABEE * fAAEF * ((1 - d0) / 2)) + (fABEE * fABEF * ((1 - d0) / 4)) +
  (fABEE * fBBEF * 0) + (fABEE * fAAFF * 0) + (fABEE * fABFF * 0) + (fABEE * fBBFF * 0) +
  (fBBEE * fAAEE * 0) + (fBBEE * fABEE * 0) + (fBBEE * fBBEE * 0) + (fBBEE * fAAEF * 0) +
  (fBBEE * fABEF * 0) + (fBBEE * fBBEF * 0) + (fBBEE * fAAFF * 0) + (fBBEE * fABFF * 0) +
  (fBBEE * fBBFF * 0) + (fAAEF * fAAEE * 1 / 2) + (fAAEF * fABEE * 1 / 4) +
```

```

(fAAEF * fBBEE * 0) + (fAAEF * fAAEF * 1 / 4) + (fAAEF * fABEF * 1 / 8) +
(fAAEF * fBBEF * 0) + (fAAEF * fAAFF * 0) + (fAAEF * fABFF * 0) + (fAAEF * fBBFF * 0) +
(fABEF * fAAEE * ((1 - dh) / 2)) + (fABEF * fABEE * ((1 - dh) / 4)) + (fABEF * fBBEE * 0) +
(fABEF * fAAEF * ((1 - dh) / 4)) + (fABEF * fABEF * ((1 - dh) / 8)) + (fABEF * fBBEF * 0) +
(fABEF * fAAFF * 0) + (fABEF * fABFF * 0) + (fABEF * fBBFF * 0) + (fBBEF * fAAEE * 0) +
(fBBEF * fABEE * 0) + (fBBEF * fBBEE * 0) + (fBBEF * fAAEF * 0) + (fBBEF * fABEF * 0) +
(fBBEF * fBBEF * 0) + (fBBEF * fAAFF * 0) + (fBBEF * fABFF * 0) + (fBBEF * fBBFF * 0) +
(fAAFF * fAAEE * 0) + (fAAFF * fABEE * 0) + (fAAFF * fBBEE * 0) + (fAAFF * fAAEF * 0) +
(fAAFF * fABEF * 0) + (fAAFF * fBBEF * 0) + (fAAFF * fAAFF * 0) + (fAAFF * fABFF * 0) +
(fAAFF * fBBFF * 0) + (fABFF * fAAEE * 0) + (fABFF * fABEE * 0) + (fABFF * fBBEE * 0) +
(fABFF * fAAEF * 0) + (fABFF * fABEF * 0) + (fABFF * fBBEF * 0) + (fABFF * fAAFF * 0) +
(fABFF * fABFF * 0) + (fABFF * fBBFF * 0) + (fBBFF * fAAEE * 0) + (fBBFF * fABEE * 0) +
(fBBFF * fBBEE * 0) + (fBBFF * fAAEF * 0) + (fBBFF * fABEF * 0) + (fBBFF * fBBEF * 0) +
(fBBFF * fAAFF * 0) + (fBBFF * fABFF * 0) + (fBBFF * fBBFF * 0) + 0]
fBBEEDrive = FullSimplify[(fAAEE * fAAEE * 0) + (fAAEE * fABEE * 1 / 2) + (fAAEE * fBBEE * 1) +
(fAAEE * fAAEF * 0) + (fAAEE * fABEF * 1 / 4) + (fAAEE * fBBEF * 1 / 2) +
(fAAEE * fAAFF * 0) + (fAAEE * fABFF * 0) + (fAAEE * fBBFF * 0) + (fABEE * fAAEE * (d0)) +
(fABEE * fABEE * (1 / 2)) + (fABEE * fBBEE * (1 - d0)) + (fABEE * fAAEF * (d0 / 2)) +
(fABEE * fABEF * (1 / 4)) + (fABEE * fBBEF * ((1 - d0) / 2)) + (fABEE * fAAFF * 0) +
(fABEE * fABFF * 0) + (fABEE * fBBFF * 0) + (fBBEE * fAAEE * 1) + (fBBEE * fABEE * 1 / 2) +
(fBBEE * fBBEE * 0) + (fBBEE * fAAEF * 1 / 2) + (fBBEE * fABEF * 1 / 4) + (fBBEE * fBBEF * 0) +
(fBBEE * fAAFF * 0) + (fBBEE * fABFF * 0) + (fBBEE * fBBFF * 0) + (fAAEF * fAAEE * 0) +
(fAAEF * fABEE * 1 / 4) + (fAAEF * fBBEE * 1 / 2) + (fAAEF * fAAEF * 0) +
(fAAEF * fABEF * 1 / 8) + (fAAEF * fBBEF * 1 / 4) + (fAAEF * fAAFF * 0) + (fAAEF * fABFF * 0) +
(fAAEF * fBBFF * 0) + (fABEF * fAAEE * (dh / 2)) + (fABEF * fABEE * (1 / 4)) +
(fABEF * fBBEE * ((1 - dh) / 2)) + (fABEF * fAAEF * (dh / 4)) + (fABEF * fABEF * (1 / 8)) +
(fABEF * fBBEF * ((1 - dh) / 4)) + (fABEF * fAAFF * 0) + (fABEF * fABFF * 0) +
(fABEF * fBBFF * 0) + (fBBEF * fAAEE * 1 / 2) + (fBBEF * fABEE * 1 / 4) +
(fBBEF * fBBEE * 0) + (fBBEF * fAAEF * 1 / 4) + (fBBEF * fABEF * 1 / 8) +
(fBBEF * fBBEF * 0) + (fBBEF * fAAFF * 0) + (fBBEF * fABFF * 0) + (fBBEF * fBBFF * 0) +
(fAAFF * fAAEE * 0) + (fAAFF * fABEE * 0) + (fAAFF * fBBEE * 0) + (fAAFF * fAAEF * 0) +
(fAAFF * fABEF * 0) + (fAAFF * fBBEF * 0) + (fAAFF * fAAFF * 0) + (fAAFF * fABFF * 0) +
(fAAFF * fBBFF * 0) + (fABFF * fAAEE * 0) + (fABFF * fABEE * 0) + (fABFF * fBBEE * 0) +
(fABFF * fAAEF * 0) + (fABFF * fABEF * 0) + (fABFF * fBBEF * 0) + (fABFF * fAAFF * 0) +
(fABFF * fABFF * 0) + (fABFF * fBBFF * 0) + (fBBFF * fAAEE * 0) + (fBBFF * fABEE * 0) +
(fBBFF * fBBEE * 0) + (fBBFF * fAAEF * 0) + (fBBFF * fABEF * 0) + (fBBFF * fBBEF * 0) +
(fBBFF * fAAFF * 0) + (fBBFF * fABFF * 0) + (fBBFF * fBBFF * 0) + 0]
fBBEEDrive = FullSimplify[(fAAEE * fAAEE * 0) + (fAAEE * fABEE * 0) + (fAAEE * fBBEE * 0) +
(fAAEE * fAAEF * 0) + (fAAEE * fABEF * 0) + (fAAEE * fBBEF * 0) + (fAAEE * fAAFF * 0) +
(fAAEE * fABFF * 0) + (fAAEE * fBBFF * 0) + (fABEE * fAAEE * 0) + (fABEE * fABEE * (d0 / 2)) +
(fABEE * fBBEE * (d0)) + (fABEE * fAAEF * 0) + (fABEE * fABEF * (d0 / 4)) +
(fABEE * fBBEF * (d0 / 2)) + (fABEE * fAAFF * 0) + (fABEE * fABFF * 0) + (fABEE * fBBFF * 0) +
(fBBEE * fAAEE * 0) + (fBBEE * fABEE * 1 / 2) + (fBBEE * fBBEE * 1) + (fBBEE * fAAEF * 0) +
(fBBEE * fABEF * 1 / 4) + (fBBEE * fBBEF * 1 / 2) + (fBBEE * fAAFF * 0) + (fBBEE * fABFF * 0) +
(fBBEE * fBBFF * 0) + (fAAEF * fAAEE * 0) + (fAAEF * fABEE * 0) + (fAAEF * fBBEE * 0) +
(fAAEF * fAAEF * 0) + (fAAEF * fABEF * 0) + (fAAEF * fBBEF * 0) + (fAAEF * fAAFF * 0) +
(fAAEF * fABFF * 0) + (fAAEF * fBBFF * 0) + (fABEF * fAAEE * 0) + (fABEF * fABEE * (dh / 4)) +
(fABEF * fBBEE * (dh / 2)) + (fABEF * fAAEF * 0) + (fABEF * fABEF * (dh / 8)) +
(fABEF * fBBEF * (dh / 4)) + (fABEF * fAAFF * 0) + (fABEF * fABFF * 0) + (fABEF * fBBFF * 0) +
(fBBEF * fAAEE * 0) + (fBBEF * fABEE * 1 / 4) + (fBBEF * fBBEE * 1 / 2) + (fBBEF * fAAEF * 0) +
(fBBEF * fABEF * 1 / 8) + (fBBEF * fBBEF * 1 / 4) + (fBBEF * fAAFF * 0) + (fBBEF * fABFF * 0) +
(fBBEF * fBBFF * 0) + (fAAFF * fAAEE * 0) + (fAAFF * fABEE * 0) + (fAAFF * fBBEE * 0) +
(fAAFF * fAAEF * 0) + (fAAFF * fABEF * 0) + (fAAFF * fBBEF * 0) + (fAAFF * fAAFF * 0) +
(fAAFF * fABFF * 0) + (fAAFF * fBBFF * 0) + (fABFF * fAAEE * 0) + (fABFF * fABEE * 0) +
(fABFF * fBBEE * 0) + (fABFF * fAAEF * 0) + (fABFF * fABEF * 0) + (fABFF * fBBEF * 0) +

```

```

(fABFF * fAAFF * 0) + (fABFF * fABFF * 0) + (fABFF * fBBFF * 0) + (fBBFF * fAAEE * 0) +
(fBBFF * fABEE * 0) + (fBBFF * fBBEE * 0) + (fBBFF * fAAEF * 0) + (fBBFF * fABEF * 0) +
(fBBFF * fBBEF * 0) + (fBBFF * fAAFF * 0) + (fBBFF * fABFF * 0) + (fBBFF * fBBFF * 0) + 0]
fAAEF_Drive = FullSimplify[(fAAEE * fAAEE * 0) + (fAAEE * fABEE * 0) + (fAAEE * fBBEE * 0) +
(fAAEE * fAAEF * 1 / 2) + (fAAEE * fABEF * 1 / 4) + (fAAEE * fBBEF * 0) + (fAAEE * fAAFF * 1) +
(fAAEE * fABFF * 1 / 2) + (fAAEE * fBBFF * 0) + (fABEE * fAAEE * 0) + (fABEE * fABEE * 0) +
(fABEE * fBBEE * 0) + (fABEE * fAAEF * ((1 - d0) / 2)) + (fABEE * fABEF * ((1 - d0) / 4)) +
(fABEE * fBBEF * 0) + (fABEE * fAAFF * (1 - d0)) + (fABEE * fABFF * ((1 - d0) / 2)) +
(fABEE * fBBFF * 0) + (fBBEE * fAAEE * 0) + (fBBEE * fABEE * 0) + (fBBEE * fBBEE * 0) +
(fBBEE * fAAEF * 0) + (fBBEE * fABEF * 0) + (fBBEE * fBBEF * 0) + (fBBEE * fAAFF * 0) +
(fBBEE * fABFF * 0) + (fBBEE * fBBFF * 0) + (fAAEF * fAAEE * 1 / 2) + (fAAEF * fABEE * 1 / 4) +
(fAAEF * fBBEE * 0) + (fAAEF * fAAEF * 1 / 2) + (fAAEF * fABEF * 1 / 4) +
(fAAEF * fBBEF * 0) + (fAAEF * fAAFF * 1 / 2) + (fAAEF * fABFF * 1 / 4) +
(fAAEF * fBBFF * 0) + (fABEF * fAAEE * ((1 - dh) / 2)) + (fABEF * fABEE * ((1 - dh) / 4)) +
(fABEF * fBBEE * 0) + (fABEF * fAAEF * ((1 - dh) / 2)) + (fABEF * fABEF * ((1 - dh) / 4)) +
(fABEF * fBBEF * 0) + (fABEF * fAAFF * ((1 - dh) / 2)) + (fABEF * fABFF * ((1 - dh) / 4)) +
(fABEF * fBBFF * 0) + (fBBEF * fAAEE * 0) + (fBBEF * fABEE * 0) + (fBBEF * fBBEE * 0) +
(fBBEF * fAAEF * 0) + (fBBEF * fABEF * 0) + (fBBEF * fBBEF * 0) + (fBBEF * fAAFF * 0) +
(fBBEF * fABFF * 0) + (fBBEF * fBBFF * 0) + (fAAFF * fAAEE * 1) + (fAAFF * fABEE * 1 / 2) +
(fAAFF * fBBEE * 0) + (fAAFF * fAAEF * 1 / 2) + (fAAFF * fABEF * 1 / 4) +
(fAAFF * fBBEF * 0) + (fAAFF * fAAFF * 0) + (fAAFF * fABFF * 0) + (fAAFF * fBBFF * 0) +
(fABFF * fAAEE * (1 - d1)) + (fABFF * fABEE * ((1 - d1) / 2)) + (fABFF * fBBEE * 0) +
(fABFF * fAAEF * ((1 - d1) / 2)) + (fABFF * fABEF * ((1 - d1) / 4)) + (fABFF * fBBEF * 0) +
(fABFF * fAAFF * 0) + (fABFF * fABFF * 0) + (fABFF * fBBFF * 0) + (fBBFF * fAAEE * 0) +
(fBBFF * fABEE * 0) + (fBBFF * fBBEE * 0) + (fBBFF * fAAEF * 0) + (fBBFF * fABEF * 0) +
(fBBFF * fBBEF * 0) + (fBBFF * fAAFF * 0) + (fBBFF * fABFF * 0) + (fBBFF * fBBFF * 0) + 0]
fABEF_Drive = FullSimplify[(fAAEE * fAAEE * 0) + (fAAEE * fABEE * 0) + (fAAEE * fBBEE * 0) +
(fAAEE * fAAEF * 0) + (fAAEE * fABEF * 1 / 4) + (fAAEE * fBBEF * 1 / 2) + (fAAEE * fAAFF * 0) +
(fAAEE * fABFF * 1 / 2) + (fAAEE * fBBFF * 1) + (fABEE * fAAEE * 0) + (fABEE * fABEE * 0) +
(fABEE * fBBEE * 0) + (fABEE * fAAEF * (d0 / 2)) + (fABEE * fABEF * (1 / 4)) +
(fABEE * fBBEF * ((1 - d0) / 2)) + (fABEE * fAAFF * (d0)) + (fABEE * fABFF * (1 / 2)) +
(fABEE * fBBFF * (1 - d0)) + (fBBEE * fAAEE * 0) + (fBBEE * fABEE * 0) + (fBBEE * fBBEE * 0) +
(fBBEE * fAAEF * 1 / 2) + (fBBEE * fABEF * 1 / 4) + (fBBEE * fBBEF * 0) + (fBBEE * fAAFF * 1) +
(fBBEE * fABFF * 1 / 2) + (fBBEE * fBBFF * 0) + (fAAEF * fAAEE * 0) + (fAAEF * fABEE * 1 / 4) +
(fAAEF * fBBEE * 1 / 2) + (fAAEF * fAAEF * 0) + (fAAEF * fABEF * 1 / 4) +
(fAAEF * fBBEF * 1 / 2) + (fAAEF * fAAFF * 0) + (fAAEF * fABFF * 1 / 4) +
(fAAEF * fBBFF * 1 / 2) + (fABEF * fAAEE * (dh / 2)) + (fABEF * fABEE * (1 / 4)) +
(fABEF * fBBEE * ((1 - dh) / 2)) + (fABEF * fAAEF * (dh / 2)) + (fABEF * fABEF * (1 / 4)) +
(fABEF * fBBEF * ((1 - dh) / 2)) + (fABEF * fAAFF * (dh / 2)) + (fABEF * fABFF * (1 / 4)) +
(fABEF * fBBFF * ((1 - dh) / 2)) + (fBBEF * fAAEE * 1 / 2) + (fBBEF * fABEE * 1 / 4) +
(fBBEF * fBBEE * 0) + (fBBEF * fAAEF * 1 / 2) + (fBBEF * fABEF * 1 / 4) +
(fBBEF * fBBEF * 0) + (fBBEF * fAAFF * 1 / 2) + (fBBEF * fABFF * 1 / 4) +
(fBBEF * fBBFF * 0) + (fAAFF * fAAEE * 0) + (fAAFF * fABEE * 1 / 2) + (fAAFF * fBBEE * 1) +
(fAAFF * fAAEF * 0) + (fAAFF * fABEF * 1 / 4) + (fAAFF * fBBEF * 1 / 2) +
(fAAFF * fAAFF * 0) + (fAAFF * fABFF * 0) + (fAAFF * fBBFF * 0) + (fABFF * fAAEE * (d1)) +
(fABFF * fABEE * (1 / 2)) + (fABFF * fBBEE * (1 - d1)) + (fABFF * fAAEF * (d1 / 2)) +
(fABFF * fABEF * (1 / 4)) + (fABFF * fBBEF * ((1 - d1) / 2)) + (fABFF * fAAFF * 0) +
(fABFF * fABFF * 0) + (fABFF * fBBFF * 0) + (fBBFF * fAAEE * 1) + (fBBFF * fABEE * 1 / 2) +
(fBBFF * fBBEE * 0) + (fBBFF * fAAEF * 1 / 2) + (fBBFF * fABEF * 1 / 4) +
(fBBFF * fBBEF * 0) + (fBBFF * fAAFF * 0) + (fBBFF * fABFF * 0) + (fBBFF * fBBFF * 0) + 0]
fBBEF_Drive = FullSimplify[(fAAEE * fAAEE * 0) + (fAAEE * fABEE * 0) + (fAAEE * fBBEE * 0) +
(fAAEE * fAAEF * 0) + (fAAEE * fABEF * 0) + (fAAEE * fBBEF * 0) + (fAAEE * fAAFF * 0) +
(fAAEE * fABFF * 0) + (fAAEE * fBBFF * 0) + (fABEE * fAAEE * 0) + (fABEE * fABEE * 0) +
(fABEE * fBBEE * 0) + (fABEE * fAAEF * 0) + (fABEE * fABEF * (d0 / 4)) +
(fABEE * fBBEF * (d0 / 2)) + (fABEE * fAAFF * 0) + (fABEE * fABFF * (d0 / 2)) +

```

```

(fABEE * fBBFF * d0) + (fBBEE * fAAEE * 0) + (fBBEE * fABEE * 0) + (fBBEE * fBBEE * 0) +
(fBBEE * fAAEF * 0) + (fBBEE * fABEF * 1 / 4) + (fBBEE * fBBEF * 1 / 2) + (fBBEE * fAAFF * 0) +
(fBBEE * fABFF * 1 / 2) + (fBBEE * fBBFF * 1) + (fAAEF * fAAEE * 0) + (fAAEF * fABEE * 0) +
(fAAEF * fBBEE * 0) + (fAAEF * fAAEF * 0) + (fAAEF * fABEF * 0) + (fAAEF * fBBEF * 0) +
(fAAEF * fAAFF * 0) + (fAAEF * fABFF * 0) + (fAAEF * fBBFF * 0) + (fABEF * fAAEE * 0) +
(fABEF * fABEE * (dh / 4)) + (fABEF * fBBEE * (dh / 2)) + (fABEF * fAAEF * 0) +
(fABEF * fABEF * (dh / 4)) + (fABEF * fBBEF * (dh / 2)) + (fABEF * fAAFF * 0) +
(fABEF * fABFF * (dh / 4)) + (fABEF * fBBFF * (dh / 2)) + (fBBEF * fAAEE * 0) +
(fBBEF * fABEE * 1 / 4) + (fBBEF * fBBEE * 1 / 2) + (fBBEF * fAAEF * 0) +
(fBBEF * fABEF * 1 / 4) + (fBBEF * fBBEF * 1 / 2) + (fBBEF * fAAFF * 0) +
(fBBEF * fABFF * 1 / 4) + (fBBEF * fBBFF * 1 / 2) + (fAAFF * fAAEE * 0) +
(fAAFF * fABEE * 0) + (fAAFF * fBBEE * 0) + (fAAFF * fAAEF * 0) + (fAAFF * fABEF * 0) +
(fAAFF * fBBEF * 0) + (fAAFF * fAAFF * 0) + (fAAFF * fABFF * 0) + (fAAFF * fBBFF * 0) +
(fABFF * fAAEE * 0) + (fABFF * fABEE * (d1 / 2)) + (fABFF * fBBEE * (d1)) +
(fABFF * fAAEF * 0) + (fABFF * fABEF * (d1 / 4)) + (fABFF * fBBEF * (d1 / 2)) +
(fABFF * fAAFF * 0) + (fABFF * fABFF * 0) + (fABFF * fBBFF * 0) + (fBBFF * fAAEE * 0) +
(fBBFF * fABEE * 1 / 2) + (fBBFF * fBBEE * 1) + (fBBFF * fAAEF * 0) + (fBBFF * fABEF * 1 / 4) +
(fBBFF * fBBEF * 1 / 2) + (fBBFF * fAAFF * 0) + (fBBFF * fABFF * 0) + (fBBFF * fBBFF * 0) + 0]
fAAFF_Drive = FullSimplify[(fAAEE * fAAEE * 0) + (fAAEE * fABEE * 0) + (fAAEE * fBBEE * 0) +
(fAAEE * fAAEF * 0) + (fAAEE * fABEF * 0) + (fAAEE * fBBEF * 0) + (fAAEE * fAAFF * 0) +
(fAAEE * fABFF * 0) + (fAAEE * fBBFF * 0) + (fABEE * fAAEE * 0) + (fABEE * fABEE * 0) +
(fABEE * fBBEE * 0) + (fABEE * fAAEF * 0) + (fABEE * fABEF * 0) + (fABEE * fBBEF * 0) +
(fABEE * fAAFF * 0) + (fABEE * fABFF * 0) + (fABEE * fBBFF * 0) + (fBBEE * fAAEE * 0) +
(fBBEE * fABEE * 0) + (fBBEE * fBBEE * 0) + (fBBEE * fAAEF * 0) + (fBBEE * fABEF * 0) +
(fBBEE * fBBEF * 0) + (fBBEE * fAAFF * 0) + (fBBEE * fABFF * 0) + (fBBEE * fBBFF * 0) +
(fAAEF * fAAEE * 0) + (fAAEF * fABEE * 0) + (fAAEF * fBBEE * 0) + (fAAEF * fAAEF * 1 / 4) +
(fAAEF * fABEF * 1 / 8) + (fAAEF * fBBEF * 0) + (fAAEF * fAAFF * 1 / 2) +
(fAAEF * fABFF * 1 / 4) + (fAAEF * fBBFF * 0) + (fABEF * fAAEE * 0) + (fABEF * fABEE * 0) +
(fABEF * fBBEE * 0) + (fABEF * fAAEF * ((1 - dh) / 4)) + (fABEF * fABEF * ((1 - dh) / 8)) +
(fABEF * fBBEF * 0) + (fABEF * fAAFF * ((1 - dh) / 2)) + (fABEF * fABFF * ((1 - dh) / 4)) +
(fABEF * fBBFF * 0) + (fBBEF * fAAEE * 0) + (fBBEF * fABEE * 0) + (fBBEF * fBBEE * 0) +
(fBBEF * fAAEF * 0) + (fBBEF * fABEF * 0) + (fBBEF * fBBEF * 0) + (fBBEF * fAAFF * 0) +
(fBBEF * fABFF * 0) + (fBBEF * fBBFF * 0) + (fAAFF * fAAEE * 0) + (fAAFF * fABEE * 0) +
(fAAFF * fBBEE * 0) + (fAAFF * fAAEF * 1 / 2) + (fAAFF * fABEF * 1 / 4) + (fAAFF * fBBEF * 0) +
(fAAFF * fAAFF * 1) + (fAAFF * fABFF * 1 / 2) + (fAAFF * fBBFF * 0) + (fABFF * fAAEE * 0) +
(fABFF * fABEE * 0) + (fABFF * fBBEE * 0) + (fABFF * fAAEF * ((1 - d1) / 2)) +
(fABFF * fABEF * ((1 - d1) / 4)) + (fABFF * fBBEF * 0) + (fABFF * fAAFF * (1 - d1)) +
(fABFF * fABFF * ((1 - d1) / 2)) + (fABFF * fBBFF * 0) + (fBBFF * fAAEE * 0) +
(fBBFF * fABEE * 0) + (fBBFF * fBBEE * 0) + (fBBFF * fAAEF * 0) + (fBBFF * fABEF * 0) +
(fBBFF * fBBEF * 0) + (fBBFF * fAAFF * 0) + (fBBFF * fABFF * 0) + (fBBFF * fBBFF * 0) + 0]
fABFF_Drive = FullSimplify[(fAAEE * fAAEE * 0) + (fAAEE * fABEE * 0) + (fAAEE * fBBEE * 0) +
(fAAEE * fAAEF * 0) + (fAAEE * fABEF * 0) + (fAAEE * fBBEF * 0) + (fAAEE * fAAFF * 0) +
(fAAEE * fABFF * 0) + (fAAEE * fBBFF * 0) + (fABEE * fAAEE * 0) + (fABEE * fABEE * 0) +
(fABEE * fBBEE * 0) + (fABEE * fAAEF * 0) + (fABEE * fABEF * 0) + (fABEE * fBBEF * 0) +
(fABEE * fAAFF * 0) + (fABEE * fABFF * 0) + (fABEE * fBBFF * 0) + (fBBEE * fAAEE * 0) +
(fBBEE * fABEE * 0) + (fBBEE * fBBEE * 0) + (fBBEE * fAAEF * 0) + (fBBEE * fABEF * 0) +
(fBBEE * fBBEF * 0) + (fBBEE * fAAFF * 0) + (fBBEE * fABFF * 0) + (fBBEE * fBBFF * 0) +
(fAAEF * fAAEE * 0) + (fAAEF * fABEE * 0) + (fAAEF * fBBEE * 0) + (fAAEF * fAAEF * 0) +
(fAAEF * fABEF * 1 / 8) + (fAAEF * fBBEF * 1 / 4) + (fAAEF * fAAFF * 0) +
(fAAEF * fABFF * 1 / 4) + (fAAEF * fBBFF * 1 / 2) + (fABEF * fAAEE * 0) + (fABEF * fABEE * 0) +
(fABEF * fBBEE * 0) + (fABEF * fAAEF * (dh / 4)) + (fABEF * fABEF * (1 / 8)) +
(fABEF * fBBEF * ((1 - dh) / 4)) + (fABEF * fAAFF * (dh / 2)) + (fABEF * fABFF * (1 / 4)) +
(fABEF * fBBFF * ((1 - dh) / 2)) + (fBBEF * fAAEE * 0) + (fBBEF * fABEE * 0) +
(fBBEF * fBBEE * 0) + (fBBEF * fAAEF * 1 / 4) + (fBBEF * fABEF * 1 / 8) + (fBBEF * fBBEF * 0) +
(fBBEF * fAAFF * 1 / 2) + (fBBEF * fABFF * 1 / 4) + (fBBEF * fBBFF * 0) + (fAAFF * fAAEE * 0) +

```

$$\begin{aligned}
& (fAAFF * fABEE * 0) + (fAAFF * fBBEE * 0) + (fAAFF * fAAEF * 0) + (fAAFF * fABEF * 1 / 4) + \\
& (fAAFF * fBBEF * 1 / 2) + (fAAFF * fAAFF * 0) + (fAAFF * fABFF * 1 / 2) + (fAAFF * fBBFF * 1) + \\
& (fABFF * fAAEE * 0) + (fABFF * fABEE * 0) + (fABFF * fBBEE * 0) + (fABFF * fAAEF * (d1 / 2)) + \\
& (fABFF * fABEF * (1 / 4)) + (fABFF * fBBEF * ((1 - d1) / 2)) + (fABFF * fAAFF * (d1)) + \\
& (fABFF * fABFF * (1 / 2)) + (fABFF * fBBFF * (1 - d1)) + (fBBFF * fAAEE * 0) + \\
& (fBBFF * fABEE * 0) + (fBBFF * fBBEE * 0) + (fBBFF * fAAEF * 1 / 2) + (fBBFF * fABEF * 1 / 4) + \\
& (fBBFF * fBBEF * 0) + (fBBFF * fAAFF * 1) + (fBBFF * fABFF * 1 / 2) + (fBBFF * fBBFF * 0) + 0] \\
fBBFF_{Drive} = FullSimplify[ & (fAAEE * fAAEE * 0) + (fAAEE * fABEE * 0) + (fAAEE * fBBEE * 0) + \\
& (fAAEE * fAAEF * 0) + (fAAEE * fABEF * 0) + (fAAEE * fBBEF * 0) + (fAAEE * fAAFF * 0) + \\
& (fAAEE * fABFF * 0) + (fAAEE * fBBFF * 0) + (fABEE * fAAEE * 0) + (fABEE * fABEE * 0) + \\
& (fABEE * fBBEE * 0) + (fABEE * fAAEF * 0) + (fABEE * fABEF * 0) + (fABEE * fBBEF * 0) + \\
& (fABEE * fAAFF * 0) + (fABEE * fABFF * 0) + (fABEE * fBBFF * 0) + (fBBEE * fAAEE * 0) + \\
& (fBBEE * fABEE * 0) + (fBBEE * fBBEE * 0) + (fBBEE * fAAEF * 0) + (fBBEE * fABEF * 0) + \\
& (fBBEE * fBBEF * 0) + (fBBEE * fAAFF * 0) + (fBBEE * fABFF * 0) + (fBBEE * fBBFF * 0) + \\
& (fAAEF * fAAEE * 0) + (fAAEF * fABEE * 0) + (fAAEF * fBBEE * 0) + (fAAEF * fAAEF * 0) + \\
& (fAAEF * fABEF * 0) + (fAAEF * fBBEF * 0) + (fAAEF * fAAFF * 0) + (fAAEF * fABFF * 0) + \\
& (fAAEF * fBBFF * 0) + (fABEF * fAAEE * 0) + (fABEF * fABEE * 0) + (fABEF * fBBEE * 0) + \\
& (fABEF * fAAEF * 0) + (fABEF * fABEF * (dh / 8)) + (fABEF * fBBEF * (dh / 4)) + \\
& (fABEF * fAAFF * 0) + (fABEF * fABFF * (dh / 4)) + (fABEF * fBBFF * (dh / 2)) + \\
& (fBBEF * fAAEE * 0) + (fBBEF * fABEE * 0) + (fBBEF * fBBEE * 0) + (fBBEF * fAAEF * 0) + \\
& (fBBEF * fABEF * 1 / 8) + (fBBEF * fBBEF * 1 / 4) + (fBBEF * fAAFF * 0) + \\
& (fBBEF * fABFF * 1 / 4) + (fBBEF * fBBFF * 1 / 2) + (fAAFF * fAAEE * 0) + (fAAFF * fABEE * 0) + \\
& (fAAFF * fBBEE * 0) + (fAAFF * fAAEF * 0) + (fAAFF * fABEF * 0) + (fAAFF * fBBEF * 0) + \\
& (fAAFF * fAAFF * 0) + (fAAFF * fABFF * 0) + (fAAFF * fBBFF * 0) + (fABFF * fAAEE * 0) + \\
& (fABFF * fABEE * 0) + (fABFF * fBBEE * 0) + (fABFF * fAAEF * 0) + (fABFF * fABEF * (d1 / 4)) + \\
& (fABFF * fBBEF * (d1 / 2)) + (fABFF * fAAFF * 0) + (fABFF * fABFF * (d1 / 2)) + \\
& (fABFF * fBBFF * d1) + (fBBFF * fAAEE * 0) + (fBBFF * fABEE * 0) + (fBBFF * fBBEE * 0) + \\
& (fBBFF * fAAEF * 0) + (fBBFF * fABEF * 1 / 4) + (fBBFF * fBBEF * 1 / 2) + \\
& (fBBFF * fAAFF * 0) + (fBBFF * fABFF * 1 / 2) + (fBBFF * fBBFF * 1) + 0] \\
\frac{1}{8} & (4 fAAEE + 2 (fAAEF + fABEE) + fABEF) \\
& (2 fAAEE + fAAEF + 2 fABEE - 2 d0 fABEE + fABEF - dh fABEF) \\
\frac{1}{8} & (4 fABEE^2 + 4 fABEE fABEF + fABEF^2 + 12 fABEE fBBEE - 8 d0 fABEE fBBEE + \\
& 6 fABEF fBBEE - 4 dh fABEF fBBEE + 6 fABEE fBBEF - 4 d0 fABEE fBBEF + 3 fABEF fBBEF - \\
& 2 dh fABEF fBBEF + fAAEF (2 fABEE + 4 d0 fABEE + fABEF + 2 dh fABEF + 8 fBBEE + 4 fBBEF) + \\
& 2 fAAEE ((2 + 4 d0) fABEE + fABEF + 2 dh fABEF + 8 fBBEE + 4 fBBEF)) \\
\frac{1}{8} & (2 d0 fABEE + dh fABEF + 2 fBBEE + fBBEF) (2 fABEE + fABEF + 4 fBBEE + 2 fBBEF) \\
\frac{1}{4} & (2 fAAEF^2 + 6 fAAFF fABEE - 4 d0 fAAFF fABEE + 3 fAAFF fABEF - \\
& 2 dh fAAFF fABEF + 2 fABEE fABEF - d0 fABEE fABEF - dh fABEE fABEF + \\
& fABEF^2 - dh fABEF^2 - (2 (-2 + d0 + d1) fABEE + (-2 + d1 + dh) fABEF) fABFF + \\
& fAAEE (4 fAAEF + 8 fAAFF + 3 fABEF - 2 dh fABEF + 6 fABFF - 4 d1 fABFF) + \\
& fAAEF (4 fAAFF + 3 fABEE - 2 d0 fABEE + 3 fABEF - 2 dh fABEF + 3 fABFF - 2 d1 fABFF))
\end{aligned}$$

$$\frac{1}{4} \left( 2 \text{fABEE} \text{fABEF} + \text{fABEF}^2 + 4 \text{fABEE} \text{fABFF} + 2 \text{fABEF} \text{fABFF} + 3 \text{fABEF} \text{fBBEE} - \right.$$

$$2 \text{dh} \text{fABEF} \text{fBBEE} + 6 \text{fABFF} \text{fBBEE} - 4 \text{d1} \text{fABFF} \text{fBBEE} + 3 \text{fABEE} \text{fBBEF} -$$

$$2 \text{d0} \text{fABEE} \text{fBBEF} + 3 \text{fABEF} \text{fBBEF} - 2 \text{dh} \text{fABEF} \text{fBBEF} + 3 \text{fABFF} \text{fBBEF} -$$

$$2 \text{d1} \text{fABFF} \text{fBBEF} + \text{fAAFF} \left( (2 + 4 \text{d0}) \text{fABEE} + \text{fABEF} + 2 \text{dh} \text{fABEF} + 8 \text{fBBEE} + 4 \text{fBBEF} \right) +$$

$$6 \text{fABEE} \text{fBBFF} - 4 \text{d0} \text{fABEE} \text{fBBFF} + 3 \text{fABEF} \text{fBBFF} - 2 \text{dh} \text{fABEF} \text{fBBFF} +$$

$$\text{fAAEF} \left( \text{fABEF} + 2 \text{dh} \text{fABEF} + 2 \text{fABFF} + 4 \text{d1} \text{fABFF} + 4 \text{fBBEF} + 8 \text{fBBFF} \right) + \text{fAAEF}$$

$$\left( \text{fABEE} + 2 \text{d0} \text{fABEE} + \text{fABEF} + 2 \text{dh} \text{fABEF} + \text{fABFF} + 2 \text{d1} \text{fABFF} + 4 \left( \text{fBBEE} + \text{fBBEF} + \text{fBBFF} \right) \right)$$

$$\frac{1}{4} \left( 2 \text{d1} \text{fABEE} \text{fABFF} + \text{d1} \text{fABEF} \text{fABFF} + \text{fABEF} \text{fBBEE} + 2 \text{fABFF} \text{fBBEE} + \right.$$

$$4 \text{d1} \text{fABFF} \text{fBBEE} + \text{fABEE} \text{fBBEF} + \text{fABEF} \text{fBBEF} + \text{fABFF} \text{fBBEF} + 2 \text{d1} \text{fABFF} \text{fBBEF} +$$

$$4 \text{fBBEE} \text{fBBEF} + 2 \text{fBBEF}^2 + (2 \text{fABEE} + \text{fABEF} + 8 \text{fBBEE} + 4 \text{fBBEF}) \text{fBBFF} +$$

$$\text{dh} \text{fABEF} \left( \text{fABEE} + \text{fABEF} + \text{fABFF} + 2 \left( \text{fBBEE} + \text{fBBEF} + \text{fBBFF} \right) \right) +$$

$$\text{d0} \text{fABEE} \left( \text{fABEF} + 2 \left( \text{fABFF} + \text{fBBEF} + 2 \text{fBBFF} \right) \right)$$

$$\frac{1}{8} \left( 2 \text{fAAEF} + 4 \text{fAAFF} + \text{fABEF} + 2 \text{fABFF} \right)$$

$$\left( \text{fAAEF} + 2 \text{fAAFF} + \text{fABEF} - \text{dh} \text{fABEF} + 2 \text{fABFF} - 2 \text{d1} \text{fABFF} \right)$$

$$\frac{1}{8} \left( \text{fABEF}^2 + 4 \text{fABEF} \text{fABFF} + 4 \text{fABFF}^2 + 3 \text{fABEF} \text{fBBEF} - 2 \text{dh} \text{fABEF} \text{fBBEF} + 6 \text{fABFF} \text{fBBEF} - \right.$$

$$4 \text{d1} \text{fABFF} \text{fBBEF} + 6 \text{fABEF} \text{fBBFF} - 4 \text{dh} \text{fABEF} \text{fBBFF} + 12 \text{fABFF} \text{fBBFF} -$$

$$8 \text{d1} \text{fABFF} \text{fBBFF} + \text{fAAEF} \left( \text{fABEF} + 2 \text{dh} \text{fABEF} + 2 \text{fABFF} + 4 \text{d1} \text{fABFF} + 4 \text{fBBEF} + 8 \text{fBBFF} \right) +$$

$$2 \text{fAAFF} \left( \text{fABEF} + 2 \text{dh} \text{fABEF} + 2 \text{fABFF} + 4 \text{d1} \text{fABFF} + 4 \text{fBBEF} + 8 \text{fBBFF} \right)$$

$$\frac{1}{8} \left( \text{dh} \text{fABEF} + 2 \text{d1} \text{fABFF} + \text{fBBEF} + 2 \text{fBBFF} \right) \left( \text{fABEF} + 2 \left( \text{fABFF} + \text{fBBEF} + 2 \text{fBBFF} \right) \right)$$

## Selection

**wAAEE = wAAEF = wAAFF = 1;**  
**wABEE = wABEF = wABFF = 1 - hs;**  
**wBBEE = wBBEF = wBBFF = 1 - s;**

$\bar{W} = \text{FullSimplify} [ (\text{fAAEE}_{\text{Drive}} \text{wAAEE} + \text{fAAEF}_{\text{Drive}} \text{wAAEF} + \text{fAAFF}_{\text{Drive}} \text{wAAFF}$   
 $+ \text{fABEE}_{\text{Drive}} \text{wABEE} + \text{fABEF}_{\text{Drive}} \text{wABEF} + \text{fABFF}_{\text{Drive}} \text{wABFF}$   
 $+ \text{fBBEE}_{\text{Drive}} \text{wBBEE} + \text{fBBEF}_{\text{Drive}} \text{wBBEF} + \text{fBBFF}_{\text{Drive}} \text{wBBFF}$   
 $)];$

```

fAAEE_Sel = FullSimplify[fAAEE_Drive wAAEE / W];
fABEE_Sel = FullSimplify[fABEE_Drive wABEE / W];
fBBEE_Sel = FullSimplify[fBBEE_Drive wBBEE / W];
fAAEF_Sel = FullSimplify[fAAEF_Drive wAAEF / W];
fABEF_Sel = FullSimplify[fABEF_Drive wABEF / W];
fBBEF_Sel = FullSimplify[fBBEF_Drive wBBEF / W];
fAAFF_Sel = FullSimplify[fAAFF_Drive wAAFF / W];
fABFF_Sel = FullSimplify[fABFF_Drive wABFF / W];
fBBFF_Sel = FullSimplify[fBBFF_Drive wBBFF / W];
fA_Sel = FullSimplify[fAAEE_Sel + fAAEF_Sel + fAAFF_Sel + (fABEE_Sel + fABEF_Sel + fABFF_Sel) / 2];
fB_Sel = FullSimplify[fBBEE_Sel + fBBEF_Sel + fBBFF_Sel + (fABEE_Sel + fABEF_Sel + fABFF_Sel) / 2];
fE_Sel = FullSimplify[fAAEE_Sel + fABEE_Sel + fBBEE_Sel + (fAAEF_Sel + fABEF_Sel + fBBEF_Sel) / 2];
fF_Sel = FullSimplify[fAAFF_Sel + fABFF_Sel + fBBFF_Sel + (fAAEF_Sel + fABEF_Sel + fBBEF_Sel) / 2];
ΔfA = FullSimplify[fA_Sel - fA];
ΔfB = FullSimplify[fB_Sel - fB];
ΔfE = FullSimplify[fE_Sel - fE];
ΔfF = FullSimplify[fF_Sel - fF];

(*ΔfC=FullSimplify[fC_Sel-fC];*)

(*Check: do genotype freqs after selection sum to one?*)
FullSimplify[fA_Sel + fB_Sel]
FullSimplify[fE_Sel + fF_Sel]
1
1

```

## Analysis

### Invasion of egg-acting drive modifier unlinked to the driver

```

invasionOfUnlinkedModifier =
  FullSimplify[W ΔfF / fF /. randomHaps /. D → 0 /. dh → d1 /. sum2one /. minormod] /.
  fF → 0 (*this assumes no LD and random mating*)
- (-1 + fB) fB ((-1 + 2 fB) hs - fB s) ε

(*With some rearrangement,
  invasionOfUnlinkedModeifier= -ε fA fB (fB s + (fA - fB) hs)
  So long as sh ≤ s, [
  i.e. the driver does not have an underdominant effect on fitness] this is
  guaranteed to be positive when ε is negative [i.e. the modifier dampens drive]*)

```

## Fixation of eggs-acting drive modifier unlinked to the driver

```

fixationOfUnlinkedModifier = FullSimplify[FullSimplify[
   $\bar{W} \Delta fF / (1 - fF)^2 /. \text{randomHaps} /. D \rightarrow 0 /. dh \rightarrow d1 /. \text{sum2one} /. \text{minormod} /.$ 
   $hs \rightarrow 0]] /. fF \rightarrow 1 (*\text{this assumes no LD and random mating}*)
(-1 + fB) fB^2 s \in
(*Thus the invasion and fixation conditions are equivalent*)$ 
```
